1           **Robustness of individualized inferences from longitudinal resting state dynamics**

2

3

4 Maximilian HOMMELSEN<sup>1</sup>, Shivakumar VISWANATHAN<sup>1</sup>, Silvia DAUN<sup>1,2\*</sup>

5

6 \* Corresponding author

7

8 Running title: Individualized inference for longitudinal RS

9

10 Affiliations:

11 1. Cognitive Neuroscience, Institute of Neuroscience and Medicine (INM-3), Forschungszentrum

12 Jülich, Jülich, Germany

13 2. Institute of Zoology, University of Cologne, Cologne, Germany

14

15 Corresponding author:

16 Silvia Daun, PhD

17 Cognitive Neuroscience, Institute of Neuroscience and Medicine (INM-3), Forschungszentrum

18 Jülich, 52425, Jülich, Germany

19 *Email:* [s.daun@fz-juelich.de](mailto:s.daun@fz-juelich.de), *Tel:* +49-2461-61 8638, *Fax:* +49-2461-61 1518

20

21

22

1 **ABSTRACT**

2 Tracking how individual human brains change over extended timescales is crucial in scenarios  
3 ranging from healthy aging to stroke recovery. Tracking these neuroplastic changes with resting  
4 state (RS) activity is a promising but poorly understood possibility. It remains unresolved whether a  
5 person's RS activity over time can be reliably decoded to distinguish neurophysiological changes  
6 from confounding differences in cognitive state during rest. Here, we assessed whether this  
7 confounding can be minimized by tracking the configuration of an individual's RS activity that is  
8 shaped by their distinctive neurophysiology rather than cognitive state. Using EEG, individual RS  
9 activity was acquired over five consecutive days along with activity in tasks that were devised to  
10 simulate the confounding effects of inter-day cognitive variation. As inter-individual differences are  
11 shaped by neurophysiological differences, the inter-individual differences in RS activity on one day  
12 were analyzed (using machine learning) to identify a distinctive configuration in each individual's  
13 RS activity. Using this configuration as a classifier-rule, an individual could be re-identified with  
14 high accuracy from 2-second samples of the instantaneous oscillatory power acquired on a different  
15 day both from RS and confounded-RS. Importantly, the high accuracy of cross-day classification  
16 was achieved only with classifiers that combined information from multiple frequency bands at  
17 channels across the scalp (with a concentration at characteristic fronto-central and occipital zones).  
18 These findings support the suitability of longitudinal RS to support robust individualized inferences  
19 about neurophysiological change in health and disease.

20

21 **KEYWORDS**

22 Neural plasticity, Individual differences, Individual identification, Electroencephalography  
23 (EEG), Power Spectrum, Frequency analysis, Machine learning, Multiclass classification

24

## 1 **1. INTRODUCTION**

2 Tracking how individual human brains change over extended time-scales (e.g., days to  
3 years) is crucial to monitor and modify neural plasticity processes in scenarios ranging from healthy  
4 aging (Boersma et al. 2011; Cabeza et al. 2018; Cassani et al. 2018) to stroke recovery (Giaquinto et  
5 al. 1994; Rehme et al. 2011; Wu et al. 2016; Bonkhoff et al. 2020; Saes et al. 2020; van der Vliet et  
6 al. 2020). A promising strategy to track an individual's changing neurophysiology is with repeated  
7 measurements of resting state (RS) activity, i.e., the ongoing neural oscillatory dynamics over a few  
8 minutes of wakeful rest (Vecchio et al. 2013; Carino-Escobar et al. 2019; Newbold et al. 2020;  
9 Pritschet et al. 2020; Saes et al. 2020). RS-activity has been shown to provide reliable indicators of  
10 neurobiological organization and integrity (Biswal et al. 1995; Damoiseaux and Greicius 2009; Van  
11 Den Heuvel et al. 2009; Hermundstad et al. 2013; Mišić et al. 2016; Hoenig et al. 2018; Buckner  
12 and DiNicola 2019). The apparent informativeness of RS-activity as well as its convenient  
13 acquisition at relatively low cost (for example, with electroencephalography (EEG)) supports its  
14 relevance for long-term tracking. However, the relationship between RS changes over repeated  
15 measurements to neurophysiological change is poorly understood. Decoding this relationship is  
16 crucial to draw inferences about a person's changing brain using longitudinal RS.

17 A basic inference required from longitudinal RS is about the origin of inter-day RS  
18 differences. Suppose a person's RS-activity patterns  $A_p$  and  $A_q$  (on days  $p$  and  $q$ ) are different. Is  
19 this difference attributable to (i) a possible neurophysiological change (abbreviated as  $NP+$ ), or (ii)  
20 an incidental difference in inter-day activity (i.e.,  $NP-$ )? Although an  $NP+/NP-$  decision involves  
21 many considerations, a key question is whether this decision is decodable from the relationship  
22 between  $A_p$  and  $A_q$ .

23 A major difficulty in decoding an  $NP+/NP-$  decision from RS-activity is the unconstrained  
24 format of the rest task. The rest task is defined by: (i) a *behavioral* state specified by instructions to  
25 stay still and keep eyes open (or closed) (Barry et al. 2007); and (ii) a *cognitive* state typically  
26 specified by instructions to relax and avoiding thinking of anything specific. Unlike the behavioral

1 state, the criteria to objectively verify the cognitive state are ill defined (Benjamin et al. 2010;  
2 Duncan and Northoff 2013; Kawagoe et al. 2018). Due to this ambiguity, inter-day RS changes do  
3 not have a simple correspondence to neuroplastic change. For instance, a person's incidental  
4 cognitive state during the rest-task could vary between days (e.g., session 1: free mind-wandering,  
5 session 2: struggling to stay awake, session 3: replaying emotional memories) (Diaz et al. 2013;  
6 Gonzalez-Castillo et al. 2021). The neural processing related to these differing cognitive states  
7 could in turn modify RS-activity *without* any changes to underlying neurophysiology. Therefore,  
8 large inter-day changes in RS-activity might not imply *NP+* and small changes might not imply  
9 *NP-*. Given this confounding potential built into the rest task, in the current study, we investigated  
10 whether RS-activity has other properties to support *NP+/NP-* classification.

11 Although inter-day RS *differences* are vulnerable to confounding by variable cognitive  
12 states, this might not be so for inter-day RS *commonalities*. We pursued this possibility by adopting  
13 a simple model of how inter-day RS commonalities might be structured. An individual's  
14 neurophysiology on a particular day is assumed to impose constraints on how RS-activity is  
15 configured irrespective of cognitive state. This constraint-defined configuration would be shared by  
16 RS-activity across days only if these unique constraints are also shared. Such a configuration, if it  
17 indeed exists, provides a decision-rule for *NP+/NP-* classification as follows.

18 Suppose  $C_p$  denotes the constraint-defined configuration in the activity pattern  $A_p$ . If activity  
19  $A_q$  on a different day is consistent with  $C_p$  then it supports an *NP-* classification, as inter-day  
20 consistency is assumed to require shared neurophysiological constraints. Conversely, if  $A_q$  is not  
21 consistent with  $C_p$  then it suggests a change in these constraints and supports an *NP+* classification.  
22 As this constraint-defined configuration is assumed to be independent of cognitive state, the  
23 *NP+/NP-* decisions with such a decision-rule should presumably escape confounding by inter-day  
24 cognitive variability. Thus, according to this model, *NP+* and *NP-* are hypothesized to have  
25 distinctive, decodable signatures in RS-activity. Here, we sought to empirically test this predicted  
26 decodability of longitudinal RS.

1           Using EEG, longitudinal RS-activity was acquired on five consecutive days from a group of  
2 healthy, young participants. For these data, we sought to obtain decision-rules capable of  $NP+ / NP-$   
3 classification from the power spectrum of brief two-second samples of oscillatory activity at  
4 channels across the scalp. Testing the decision-rule's robustness to confounding needed suitable  
5 samples known to be (i) free of neurophysiological change ( $NP-$ ) and (ii) samples containing such  
6 changes ( $NP+$ ).

7           Testing  $NP-$  decisions posed an experimental challenge. Our participants were assumed to  
8 be neurophysiologically stable across the five-day measurement period. However, the variation in  
9 their inter-day cognitive states during the rest-task was unverifiable. Therefore, the measurement  
10 protocol included two additional tasks to produce *pseudo-rest* states that were matched to rest in  
11 behavior but not in cognitive state (Figure 1A). These pseudo-rest states served to simulate  
12 confounding RS differences of varying sizes and complexity and allowed a rigorous test of the  
13 robustness of  $NP-$  decisions.

14           Testing  $NP+$  decisions presented a methodological conundrum. Over long time-scales, an  
15 individual's neurobiology could change in variety of possible ways (Cabeza et al. 2018; Grefkes  
16 and Fink 2020), with very different associated consequences for RS-activity (Figure 1B). These  
17 hypothetically possible RS-activity patterns were, by definition, experimentally inaccessible and  
18 limited the options for an individual-specific test of  $NP+$  classification. As a pragmatic alternative,  
19 we used a cross-sectional approach where RS-activity from *other* individuals served as simulated  
20 examples of RS-activity requiring an  $NP+$  classification. We assume that an individual  $S$ 's  
21 neurophysiology differed from other individuals in the tested population to variable extents.  
22 Therefore, relative to each individual  $S$ , the RS-activity of others provided a diverse range of  
23 examples of RS-activity with an origin in true neurophysiological differences.

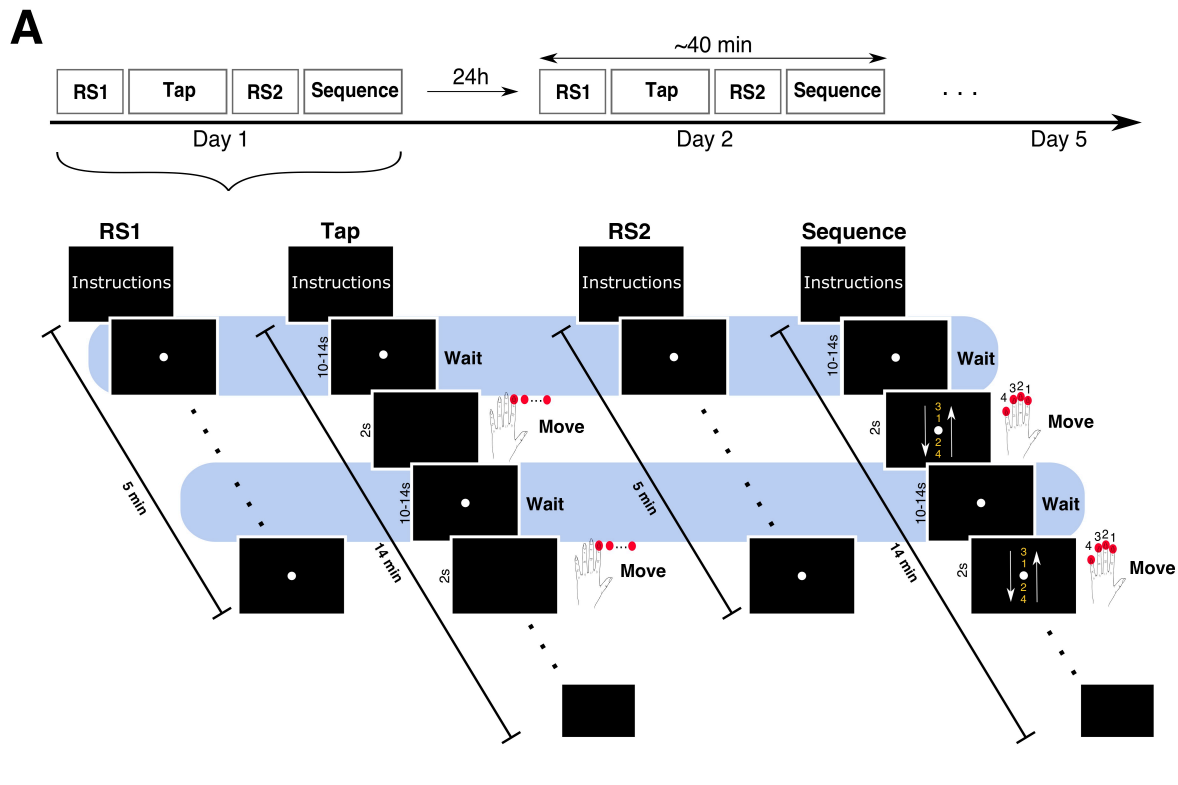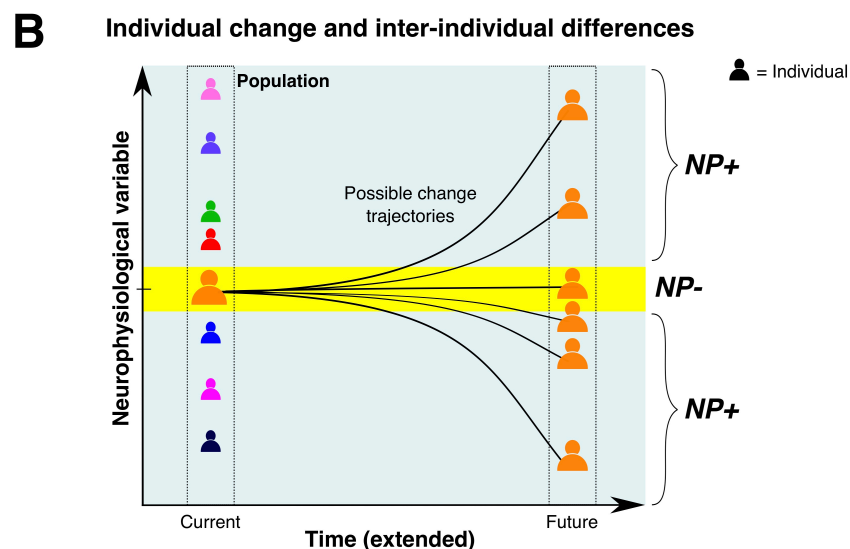

1 **Figure 1: Experiment rationale** (A) Four tasks (*RS1*, *Tap*, *RS2*, *Sequence*) were performed in the same fixed order  
2 daily on five consecutive days. Task details for one day are schematically illustrated. A white fixation point was  
3 continuously displayed during the *RS1* and *RS2* task periods, and during “waiting” periods in the *Tap* and *Sequence*  
4 tasks (highlighted in blue). In the *Tap* task, a blank screen cued a 2s movement interval requiring left index-finger  
5 movements to repeatedly press a button (shown as red dots). In the *Sequence* task, the movement cue was an image  
6 depicting four numbers between two arrows (not drawn to scale) indicating the sequence of buttons to be pressed in a  
7 continuous cyclical manner, e.g., 3-1-2-4-4-2-1-3-3-1-2-4, etc. Number-to-finger mapping is shown on cartoon hand.  
8 (B) Schematic of longitudinal changes to a single hypothetical neurophysiological variable for one selected individual  
9 (orange). The current value of this variable (yellow area; *NP-*) can change in a variety of possible ways over long time-  
10 scales (gray area; *NP+*). The values of this variable in other individuals in a population cross-section (colored icons)  
11 provide proxies for these unknown individual-specific change trajectories.

1 By adopting the above strategy to obtain suitable *NP-* and *NP+* examples, the demands for  
2 *NP+/NP-* classification shared similarities to the demands for *person* identification, namely,  
3 obtaining a decision-rule to distinguish *S* from other individuals based on RS-activity (Figure 1B).  
4 Numerous prior studies demonstrate that RS-activity can serve as a “fingerprint” for person  
5 identification (Huang et al. 2012; Campisi and Rocca 2014; Finn et al. 2015; Valizadeh et al. 2019;  
6 Pani et al. 2020). Although our focus was not on the neural basis of individual differences and trait-  
7 identification (Smit et al. 2005, 2006; Demuru et al. 2017; Finn et al. 2017; Gratton et al. 2018), this  
8 person identification approach provided a convenient technical platform for our test of individual-  
9 specific longitudinal inference. Therefore, we mapped our test of robust cross-day *NP+/NP-*  
10 classification into the terminology of a person identification problem and adopted a machine-  
11 learning approach to address this problem.

12 Decision-rules (i.e., classifiers) were trained to distinguish a person *S* from all others in the  
13 tested population using samples from a single day. The samples from *S* putatively share a  
14 constraint-defined configuration that is not shared by samples from other individuals. Therefore, the  
15 outcome of training should be a decision-rule that represents information about individual *S*'s  
16 unique configuration. If this is indeed true, *S*'s decision-rule from one day should enable *S* to be re-  
17 identified from samples acquired on a different day as well as from samples of pseudo-RS activity  
18 despite cognitive state variability (*NP-*). Conversely, *S*'s decision-rule should classify samples from  
19 other individuals as not-*S*, consistent with a difference in neurophysiology co-mingled with  
20 cognitive state differences (*NP+*).

21

## 22 **2. MATERIALS & METHODS**

### 23 **2.1. Participants**

24 Twenty seven healthy volunteers (11 female, age (mean  $\pm$  sd): 27.9 years  $\pm$  3.4, range: 22-34  
25 years) participated in the study and received monetary compensation. Participants had normal or  
26 corrected-to-normal vision; no history of neurological or psychiatric disease; were not under

1 medication at that time; and had no cranial metallic implants (including cochlear implants).  
2 Handedness was not an inclusion criterion. Based on the Edinburgh Handedness Inventory  
3 (Oldfield 1971), 22 participants were right handed (score > 50), 2 were left handed (score < -50)  
4 and 3 had intermediate scores. The study was approved by the Ethics Commission of the Faculty of  
5 Medicine, University of Cologne (Zeichen: 14-006). All participants provided their written  
6 informed consent before the start of the experiment.

7 Datasets from 24 (of the 27) participants were used for statistical analyses (see section 2.6).

8

## 9 **2.2. Apparatus and EEG data acquisition**

10 Stimuli were displayed using the software Presentation (v. 20.2 Build 07.25.18,  
11 Neurobehavioral Systems, Inc.) on an LCD screen (Hanns-G HS233H3B, 23-inch, resolution:  
12 1920 x 1080 pixels). Behavioral responses were recorded with the fMRI Button Pad (1-Hand)  
13 System (LXPAD-1x5-10M, NAtA Technologies, Canada).

14 Scalp-EEG was acquired with a 64-channel active Ag/AgCl electrode system (actiCap,  
15 Brain Products, Germany) having a standard 10-20 spherical array layout (ground electrode at AFz,  
16 reference electrode on the left mastoid). Three electrodes (FT9, FT10, TP10) were used to record  
17 electrooculographic (EOG) activity: one below the left eye to record vertical movements and the  
18 other two near the left and right lateral canthi to record horizontal movements. During acquisition,  
19 measured voltages (0.1 $\mu$ V resolution) were amplified by a BrainAmp DC amplifier (BrainProducts  
20 GmbH, Germany) at a sampling rate of 2.5 kHz and filtered (low cutoff: DC, high cutoff: 250 Hz).

21 To ensure reliable positioning of the EEG cap across sessions, a stereotactic neuronavigation  
22 system (Brainsight v. 2.3, Rogue Research Inc, Canada) was used on each session to co-register the  
23 spatial coordinates of five selected electrodes (AFz, Cz, POz, C5, C6) to their coordinates on the  
24 first session (see section 2.4 for details).

25

26



### 1 **2.3. Experiment protocol and paradigm**

2 Participant completed five sessions of approximately 40 minutes each (Figure 1A, upper  
3 panel) scheduled at the same time on consecutive days (Monday to Friday). Sessions took place at  
4 three possible times: morning (6 x 9AM), noon (9 x 12PM) and afternoon (12 x 3PM). Due to  
5 technical problems during the scheduled recording, for one participant, the fifth session was re-  
6 acquired after a gap of three days. For all participants, every session consisted of two resting state  
7 recordings (*RS1* and *RS2*) interleaved with two non-rest tasks (referred to as *Tap* and *Sequence*) in  
8 the same order (namely, *RS1*, *Tap*, *RS2*, *Sequence*).

9 The *Tap* and *Sequence* tasks (Figure 1A, lower panel) involved some special design  
10 considerations. Both tasks required participants to press buttons in response to visual cues.  
11 However, these tasks had relatively long and variable inter-stimulus-intervals (10-14s) where  
12 participants fixated on the screen as they “waited” for the visual cue that required the instructed  
13 response. The cognitive states during these waiting periods (referred to as *TapWait* and *SeqWait*)  
14 were the primary focus of these tasks. The behavioral demands of the *Tap* and *Sequence* tasks were  
15 designed to modulate the cognitive states during these pre-movement wait periods, for example,  
16 covert movement preparation during *TapWait* and covert rehearsal of a movement sequence during  
17 *SeqWait*. With this covert modulation, the *TapWait* and *SeqWait* could be considered pseudo-rest  
18 states as they were matched to *RS1* and *RS2* in behavioral state but not in cognitive state.  
19 Furthermore, the *Tap* task was intended to produce cognitive states that were similar within and  
20 between days while the *Sequence* task was designed to elicit cognitive states that could  
21 systematically change across days. This was implemented by inducing participants to learn a  
22 difficult motor sequence where performance could improve with increasing practice across days.  
23 We now describe the different task periods in detail.

24 Each task period began with an instruction screen describing the task to be performed and  
25 ended with another instruction screen that instructed participants to take a short break and press a  
26 button to initiate the next part when they were ready.

1 1: Resting State (RS1). During this period lasting ~5minutes, a small white dot was continuously  
2 displayed at the center of the screen. Participants were instructed to keep their eyes open, fixate on  
3 the displayed white dot, relax and avoid movements (also see section: Procedure).

4  
5 2: Tap task. In this task-period, a small white dot was centrally displayed on the screen (as in *RS1*).  
6 However, after variable intervals of 10-14 seconds, this dot disappeared for a 2 second period  
7 before reappearing. The offset of the dot was the cue for participants to repeatedly and rapidly press  
8 a button with their left index finger until the dot reappeared on the screen. The total task (duration  
9 ~14 minutes) consisted of 60 movement periods (dot absent) interleaved with 60 waiting periods  
10 (dot present). These waiting periods are referred to as *TapWait* and the response execution periods  
11 are referred to as *TapMov*.

12  
13 3: Resting State (RS2). A second resting state recording was acquired with all task parameters being  
14 identical to *RS1*. This recording is referred to as *RS2*.

15  
16 4: Sequence task. As with the *Tap* task, the sequence task consisted of 60 waiting periods of 10-14s  
17 each (i.e., *SeqWait*) where a small white dot was centrally displayed on the screen interleaved with  
18 60 movement periods of 2s duration (i.e., *SeqMov*). Unlike the *Tap* task, each movement period was  
19 cued by a centrally displayed visual stimulus consisting of four vertically displayed digits (3-1-2-4)  
20 between two vertical arrows. Each number was mapped to a different button on the response pad.  
21 The vertical ordering of the numbers indicated the sequence in which the indicated buttons had to  
22 be pressed using fingers of the left hand. The arrows indicated that this sequence had to be executed  
23 rapidly and repeatedly in a cyclical manner starting from top to bottom and back. For example,  
24 following stimulus onset, the required sequence of button-presses was 3-1-2-4-4-2-1-3-3-1-2-4-...  
25 and so on. This continuing sequence had to be executed until the offset of the stimulus. No  
26 performance feedback was provided during the task. This particular sequence of digits was selected

1 as it was challenging to execute rapidly. To promote learning of this sequence across trials and  
2 days, the same sequence of numbers and number-to-finger-mapping was used on all sessions. The  
3 same sequence and number-to-finger mapping was also used for all participants.

4 Handedness was not an inclusion criterion in our experiment. However, for uniformity in  
5 task-related neural activity, all participants used fingers of their left hand to execute the button-press  
6 responses in the *Tap* and *Sequence* tasks.

7

## 8 **2.4. Procedure**

9 Prior to the start of the recordings on each of the five days, participants completed the  
10 Positive and Negative Affect Schedule (PANAS) (Watson et al. 1988) and completed brief  
11 questionnaires to report the caffeine consumption on that day and the amount and quality of sleep  
12 on the previous night.

13 On the first day, participants received detailed instructions about the experiment. For the  
14 resting state periods, participants were instructed to keep their eyes open, fixate on the displayed  
15 white dot and to avoid movements. Additionally, they were also asked to relax, stay awake and not  
16 think of anything in particular. For the *Tap* task, participants were instructed to press the buttons as  
17 rapidly as possible without causing discomfort. For the *Sequence* task, participants were  
18 familiarized with the task and the mapping of the number to finger. They practiced performing the  
19 task using a different digit sequence from the one used in the main experiment. Furthermore, they  
20 were explicitly instructed on each session to try to improve their performance particularly the  
21 number of buttons pressed during each response period. Finally, on all sessions, we repeatedly  
22 emphasized the importance of minimizing eye-blinks, maintaining fixation at all times during the  
23 recording, and the avoidance of all unnecessary movements of the fingers, head and body.

24 As the study's objective was to relate the spatio-temporal organization of neural activity  
25 across days, minimizing inter-day variation in the EEG cap's position was an important priority. We  
26 therefore implemented an additional spatial registration procedure on each day after the EEG cap

1 was secured to the participant's head. Using a stereotactic neuronavigation system, the participant's  
2 head was registered to the Montreal Neurological Institute (MNI) space using standard cranial  
3 landmarks. The positions of five selected electrodes along the midline and lateral axis (AFz, Cz,  
4 POz, C5, C6) were then localized using the neuronavigation software. The electrode locations  
5 obtained on the first day were used as the reference for the remaining sessions. On each subsequent  
6 session, the positioning of the cap was interactively adjusted so that each electrode's coordinates  
7 closely matched its reference location. Due to scheduling constraints, this spatial registration  
8 procedure was not performed for 7 participants.

9 The application of electrode gel followed after cap positioning. Skin-electrode impedance  
10 was brought below 10k $\Omega$  before starting the recording. Recordings were acquired in a light-dimmed  
11 and acoustically shielded EEG chamber. Participants were seated in a comfortable chair with their  
12 heads stabilized with a chinrest in front of the computer screen at a viewing distance of ~65cm. The  
13 response pad was placed in a recess under the table so that participants could not see their hands  
14 during the task-periods especially while pressing the buttons. During the recording, participants  
15 were monitored via a video camera to ensure that they maintained fixation, minimized eye-blinks,  
16 and stayed awake.

17

## 18 **2.5. EEG preprocessing**

19 The EEG data were preprocessed using the EEGLAB software (Delorme and Makeig 2004)  
20 and custom scripts in a MATLAB environment (R2016b, MathWorks, Inc., Natick, MA).

21 The continuous recordings were down-sampled to 128Hz, and then band-pass filtered to the  
22 range 1Hz-40Hz with a Hamming windowed sinc FIR filter (high pass followed by low pass). The  
23 continuous recordings then underwent an artifact correction process to remove oculomotor activity  
24 related to eye-blinks and saccades.

25 Eye blink removal was performed separately for each day's dataset (including all task  
26 periods) using the procedure described by Winkler et al. (2015). Following this procedure, a copy of

1 a dataset was first created which was then filtered with a high-pass 2 Hz filter. This duplicate  
2 dataset was visually inspected to remove data segments and EEG channels with artifacts related to  
3 repeated paroxysmal amplitudes changes ( $> 50\mu\text{V}$ ), electromyographic contamination, electrical  
4 noise and signal loss. Next, the artifact-free data from all task-periods were segmented into 2s  
5 epochs. These epochs were then submitted to an Independent Components Analysis (ICA)  
6 decomposition using the infomax-ICA algorithm (implemented as *runica* in EEGLAB). To  
7 minimize inter-condition biases, ICA was performed on a balanced mixture of epochs from *RS1*,  
8 *TapWait*, *RS2* and *SeqWait*. Epochs from the *TapMov* and *SeqMov* periods were excluded from this  
9 step to avoid movement-specific biases. The ICA weights obtained with the duplicate dataset were  
10 then transferred and applied to the original, non-filtered dataset. ICA components related to eye-  
11 blinks and saccades were then identified and removed using an automatic detection algorithm  
12 ADJUST (Mognon et al. 2011).

13 Following eye-blink correction, the original dataset was then again visually inspected to  
14 remove time periods and channels with artifacts. The signals in rejected channels were replaced  
15 with signals interpolated from other channels using spherical spline interpolation. All channels were  
16 then re-referenced to the Common Average Reference. Finally, the visually inspected continuous  
17 data were segmented into 2s epochs according to the six different experimental states: *RS1*, *RS2*,  
18 *TapWait*, *TapMov*, *SeqWait* and *SeqMov*. The epoch duration of 2s was heuristically selected to  
19 meet the tradeoff of (i) being short enough to obtain a sufficient number of samples for the  
20 machine-learning analysis (see section 2.6) while (ii) being long enough to obtain a suitable  
21 estimate of the power spectrum. Furthermore, this allowed epochs from the non-movement periods  
22 to match the 2s duration of the task-defined movement period.

23 For the two movement-related states (*TapMov* and *SeqMov*), epochs were defined from  
24 +0.25s to +2.25s following the visual cue to exclude initial transients and response-time delays  
25 following cue onset and to include residual movements in the period immediately following the cue  
26 offset. To avoid any carry-over effects from movement into the *TapWait* and *SeqWait* epochs, a

1 time interval of 500ms immediately prior to cue onset and 1000ms immediately following cue  
2 offset were excluded before segmenting the *TapWait* and *SeqWait* epochs. Furthermore, all *TapWait*  
3 and *SeqWait* epochs that contained button presses were excluded.

4 To establish face-validity of the task states based on their time-courses, we created a  
5 separate set of epochs from -1 to +3s relative to the onset of the visual cue. The signals were band-  
6 pass filtered in the  $\beta$  frequency band (14-30Hz) and the signal amplitude was extracted using the  
7 Hilbert transform. After removing edge artifacts, the signal was normalized by calculating the  
8 percentage change in the signal relative to the mean amplitude in the pre-stimulus period [-898ms,  
9 0ms]. After normalization, the signals were averaged across epochs, days and individuals.

10

## 11 **2.6. Data quality assessment**

12 Preprocessing resulted in 135 datasets (27 participants x 5 days). To be included in our  
13 analysis, each subject had to have completed the first three of the four tasks on all sessions and have  
14 at least 4 (out of 5) session-datasets that met the following data-quality criteria for analysis. We  
15 required a preprocessed dataset to have (i) less than seven rejected channels, (ii)  $\geq 90$  artifact-free  
16 epochs from both resting state periods (i.e., *RS1* and *RS2*), and (iii)  $\geq 90$  artifact-free epochs from  
17 the available resting-matched conditions (i.e., *TapWait*, *SeqWait*). Note that the number of epochs  
18 for *TapMov* and *SeqMov* were necessarily  $\leq 60$  as each task only had 60 response periods of 2s  
19 duration.

20 Datasets from 24 out of 27 participants met these data-quality criteria: 18 (of 24) had  
21 completed all 4 task-periods on each session and the remaining 6 (of the 24) participants had  
22 completed only the first 3 (of the 4 parts). To maintain uniformity in the statistical analyses, final  
23 analyses were performed only on the best 4 of the 5 session-datasets. For participants where all 5  
24 datasets were of high quality, we excluded the first day's dataset as it might involve effects of initial  
25 familiarization. To maximize the use of the available data after these exclusions, analyses involving  
26 only *RS1* and *RS2* included data from 24 participants, while analyses involving any of the non-rest

1 tasks used data from 18 participants. For these 18 participants, the mean number of epochs per day  
2 in *TapMov* was 52.7 (min: 45.3, max: 57.7; SD = 2.9; minimum/day = 36) and in *SeqMov* was 53.4  
3 (min: 49.2, max: 57.7; SD = 2.5; minimum/day = 42).

4

## 5 **2.7. Feature specification: Oscillatory power spectrum**

6 All classification analyses were based on a description of the oscillatory power spectrum on  
7 each 2-second epoch. Each epoch's power spectrum was described using 305 features that specified  
8 the power in five canonical frequency bands ( $\delta$ : 1-3.5 Hz;  $\theta$ : 4-7.5 Hz;  $\alpha$ : 8-13.5 Hz;  $\beta_1$  (low  $\beta$ ): 14-  
9 22.5;  $\beta_2$  (high  $\beta$ ): 23-30 Hz) at each of the 61 channels.

10 These features were extracted with the procedure schematically displayed in Figure 2A. For  
11 each 2s epoch of EEG activity, the oscillatory power spectrum at each channel over the range of 1  
12 to 30 Hz (0.5Hz resolution) was computed using the Fast Fourier Transform (FFT). The power at  
13 all frequencies within each band's frequency range was averaged to obtain the mean power per  
14 frequency band. The mean power per band was then logarithmically transformed (base 10) so that  
15 the resulting distribution across epochs had an approximate normal distribution. These five features  
16 (one per band) provided a minimal description of each channel's power spectrum. Finally, these  
17 five features from each channel were concatenated to obtain a single vector with 305 feature values  
18 (5 frequency bands x 61 channels). This extended feature set describing an epoch's power spectrum  
19 across the scalp was used for the classification analyses.

20 For detailed analyses, we defined subsets of the full feature set referred to here as the (i)  
21 mono-band and (ii) mono-location feature sets. Each *mono-band* feature set ( $B_f$ ) consisted of  
22 features belonging to only one frequency band  $f$ . The five mono-band feature sets (each with 61  
23 features) were  $B_\delta$ ,  $B_\theta$ ,  $B_\alpha$ ,  $B_{\beta_1}$  and  $B_{\beta_2}$ . Each *mono-location* feature set ( $L_z$ ) (Figure 2A, top panel)  
24 consisted of features from 10 bilaterally symmetric channels in the spatial zone  $z$  on the scalp along  
25 the anterior-posterior axis. The four mono-location sets were defined at the frontal ( $L_F$ ); fronto-  
26 central ( $L_{FC}$ ), centro-parietal ( $L_{CP}$ ) and parieto-occipital ( $L_{PO}$ ) zones respectively.

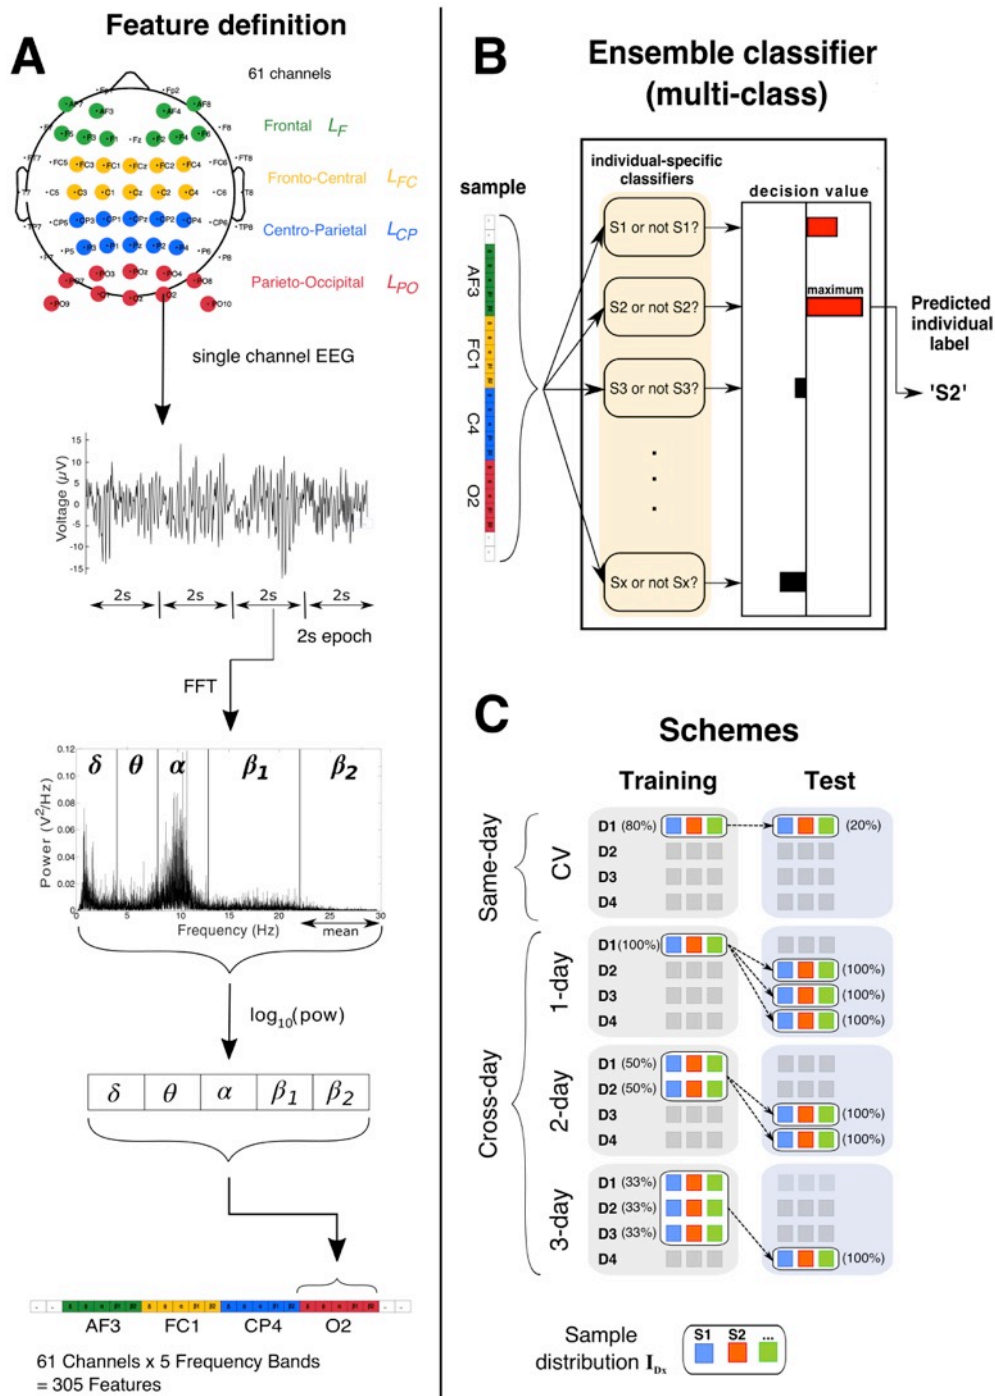

1 **Figure 2: Classification procedure.** (A) Feature definition pipeline. Channels in each mono-location subset are  
 2 identified by color (green:  $L_F$ , yellow:  $L_{FC}$ , blue:  $L_{CP}$ , red:  $L_{PO}$ ). The continuous signal from each channel was segmented  
 3 into 2s epochs followed by an estimation of the frequency spectrum with the Fast Fourier Transform (FFT). The mean  
 4 power within each of the five bands was log transformed (base 10) and concatenated with corresponding values from all  
 5 other channels to obtain a feature vector. (B) Schematic of a multiclass decision with an ensemble of individual-specific  
 6 binary classifiers. Each classifier evaluates the sample ( $S_x$  or not- $S_x$ ) to output a decision-value (red bars  $> 0$ , black bars  
 7  $< 0$ ) and the classifier with the maximum decision value was the predicted label (here, S2). (C) Classification schemes  
 8  $A_{I_{D_x}} \rightarrow A_{I_{D_y}}$  (rows) were defined by the configuration of training (left column) and test sets (right column) (where  $D_i$   
 9 denotes samples from day  $i$ ). The sample distribution ( $I_{D_x}$ ) had samples from all individuals (multi-colored boxes).  
 10 Percentages indicate the proportion of each day's samples used for training/testing. Same-day identification was  
 11 estimated with 5-fold cross-validation (CV). The training set for cross-day aggregation had an equal proportion of  
 12 samples from each day and the total number of training samples was the same across aggregation levels.



## 1 **2.8. Multi-class classification**

### 2 **2.8.1. Definition**

3 All classification models were numerically estimated using a soft-margin linear Support  
4 Vector Machine (SVM, with  $L_2$  regularization) algorithm as implemented by the *LinearSVC*  
5 package in the *scikit-learn* library (Pedregosa et al. 2011) implemented in Python 3.6. SVM  
6 learning was initialized with parameters (tolerance =  $10^{-5}$ , max iterations =  $10^4$ , hinge loss, balanced  
7 class weighting). The hyper-parameter  $C$  had a value of 1, which has been shown to be a reasonable  
8 default for M/EEG classification (Varoquaux et al. 2017). For our data, tuning  $C$ 's value seemed to  
9 produce only marginal changes to the classification accuracies (results not shown).

10 As defined above, each epoch was a 2-second sample of the ongoing oscillatory activity  
11 from one person (of 24) on one specific day (of 4) engaged in a particular task state (of 6 possible  
12 states: true rest  $\{RS1, RS2\}$ , pseudo-rest  $\{TapWait, SeqWait\}$ , non-rest  $\{TapMov, SeqMov\}$ ). The  
13 classification analyses involved predicting an epoch's origin either by (i) a person's identity or (ii)  
14 task-state. Multi-class classifiers (using an ensemble of binary classifiers) were used for person  
15 identification as described below. Standalone binary classifiers were used to distinguish alternative  
16 task-states within the same person.

17 The input to a multi-class classifier (see Figure 2B) was a single sample (i.e., epoch) from an  
18 unspecified person  $S_x$  in the studied group and the required output was the predicted identity of that  
19 person (e.g.,  $S_2$ ). The multi-class classifiers used here employed a *one-vs-all* scheme (as  
20 implemented by *scikit-learn*). Specifically, an  $N$ -class classifier ( $N \geq 2$ ) consisted of an ensemble of  
21  $N$  binary-classifiers. Each of these binary classifiers was independently trained to distinguish  
22 whether a sample was from one specific person (e.g.,  $S_2$ ) or from any of the other  $N-1$  persons (i.e.,  
23 not  $S_2$ ). Therefore, each individual was associated with a unique classifier in the ensemble. To  
24 obtain a classification with such an ensemble, each sample was separately evaluated by each of the  
25  $N$  binary-classifiers to obtain a decision value from each classifier (i.e., the signed distance to the  
26 separation hyperplane (Rifkin and Klautau 2004)). These decision values were compared and the

1 final classification was assigned to the binary classifier with the maximum decision value.

2

### 3 *2.8.2. Accuracy scoring*

4 Even though an ensemble was used for multi-class classification, our interest was in the  
5 accuracy of each individual-specific binary classifier in the ensemble. To obtain a measure of  
6 classification accuracy of each individual classifier from the ensemble classification accuracy, we  
7 defined the accuracy  $a_i$  of the classifier for person  $S_i$  as

$$a_i = \frac{1}{2} (H_i + CR_i)$$

8 where  $H_i$  denotes the hit rate (i.e., positive identification rate) of the classifier and  $CR_i$  denotes the  
9 correct rejection rate. The hit rate  $H_i$  was the proportion of instances where samples from  $S_i$  were  
10 correctly predicted as being from  $S_i$  by the ensemble (i.e., a true positive where the classifier  $S_i$  had  
11 a larger decision value than the competing classifiers). Correct rejection was defined based on the  
12 pair-wise relationship of  $S_i$  to each of the other classifiers  $S_j$ . If the ensemble (incorrectly) predicts  $S_i$   
13 for a sample from a different person  $S_j$  then it implies that the classifier  $S_i$  (incorrectly) had a larger  
14 decision value than the competing classifiers, i.e., a false positive. The false positive rate  $FP_{ij}$   
15 denotes the proportion of instances where samples from  $S_j$  were incorrectly predicted as being from  
16  $S_i$  by the ensemble. The correct rejection  $CR_{ij}$  was defined as  $CR_{ij} = 1 - FP_{ij}$ . Based on this  
17 rationale, the overall correct rejection  $CR_i$  for  $S_i$  was defined as the mean of the pair-wise correct  
18 rejection rates

$$CR_i = \frac{1}{N-1} \sum_{j=1}^N CR_{i,j} \text{ where } j \neq i$$

19 With this formulation, random chance for each classifier was 50% even though random  
20 chance for the entire ensemble was  $(100/N)\%$ .

21 To identify individuals who were frequently misclassified (i.e., confused) with each other,  
22 we report confusion matrices for cross-day classification. In this confusion matrix, the rows

1 represent the true label of a sample and the columns indicate the predicted label for that sample by  
2 the ensemble. The value for the row corresponding to individual  $S_i$  and column corresponding to  
3 individual  $S_j$  indicated the proportion of samples from  $S_i$  that were classified as  $S_j$ . The  
4 rows/columns of the matrices were re-organized to cluster together individuals who were confused  
5 with each other. This was implemented with the so-called Louvain method to maximize modularity  
6 (Blondel et al. 2008), implemented in the Community Detection Toolbox (Kehagias 2021).

7 The accuracy score can have different contributions from the hit-rate (e.g., high false  
8 negatives) and the correct rejection rate (e.g., high false positives). To disentangle these  
9 contributions, we estimated the *recall* and *precision* scores from the confusion matrix (Davis and  
10 Goadrich 2006). The *recall* score for individual  $S_i$  is the ratio (True Positives)/(True Positives +  
11 False negatives). The recall score for  $S_i$  would be low if samples from  $S_i$  are misclassified as  
12 belonging to another individual (i.e., false negatives). The precision score for individual  $S_i$  is the  
13 ratio (True Positives)/(True positives + False positives). The precision score for  $S_i$  would be low if  
14 samples from other individuals are misclassified as belonging to  $S_i$  (i.e., false positives).

15

### 16 **2.8.3. Training and testing schemes**

17 Classification was defined by the samples used for training and testing. Irrespective of  
18 classifier type (multi-class or standalone binary classifier), the training data were always balanced,  
19 (i.e., having an equal number of samples per class) to avoid biases arising from imbalanced classes  
20 (Abraham and Elrahman 2013).

21 Person (multi-class) identification was organized into two schemes based on whether the  
22 training and test samples belonged to the (i) same day (namely, same-day vs cross-day  
23 identification) and the (ii) same task (namely, same-task vs cross-task identification). A schematic  
24 of the same-day/cross-day schemes are shown in (Figure 2C). For convenience, we use the  
25 following notational convention to describe these classification schemes. As multi-class  
26 classification involves an ensemble decision, it involves the conjoint influence of the sample

1 distributions from multiple persons. This combined distribution on a particular state (e.g.,  $RSI$ ) on  
2 day  $d$  is denoted as  $^{RSI}\mathbf{I}_d$ . A classification scheme where a decision-rule is trained on samples from  
3  $^A\mathbf{I}_p$  (i.e., from task state  $A$  on day  $p$ ) and tested on samples from  $^B\mathbf{I}_q$  (i.e., from state  $B$  on day  $q$ ) is  
4 denoted as  $^A\mathbf{I}_p \rightarrow ^B\mathbf{I}_q$ . Similarly, a classification scheme where a decision-rule was trained on  
5 samples aggregated from different days (e.g.,  $^A\mathbf{I}_p$  and  $^A\mathbf{I}_q$ ) and tested on  $^B\mathbf{I}_r$  is denoted as  $^A\mathbf{I}_p \circ ^A\mathbf{I}_q$   
6  $\rightarrow ^B\mathbf{I}_r$  (see below).

7 Same-day/same-task identification: The accuracy of same-day person identification in task  
8 state  $A$  ( $^A\mathbf{I}_p \rightarrow ^A\mathbf{I}_p$ ) was estimated using a 5-fold cross-validation (CV) procedure (Blum et al.  
9 1999). Specifically, the set of samples from state  $A$  on one day (for example, day D1 in Figure 2C,  
10 upper row), were partitioned into 5 equal folds. Training was performed on four folds (80% of the  
11 sample set) and tested on the left-out fifth fold (the remaining 20%). This training-testing procedure  
12 was repeated so that each fold was used as a test-set once. The mean classification accuracy across  
13 folds was defined as the same-day identification accuracy for that day. In this manner, the CV  
14 accuracy was estimated separately for each of the four days and the mean CV accuracy across days  
15 was denoted as the same-day accuracy for task state  $A$ .

16 Cross-day/same-task identification: For cross-day identification in task state  $A$  ( $^A\mathbf{I}_p \rightarrow ^A\mathbf{I}_q$ ),  
17 samples in the test set were from a different day than the samples in the training set. We modulated  
18 the training set's day-specificity by aggregating samples from different days in a stratified manner.  
19 In an  $n$ -day training set, the  $k$  training samples per person consisted of  $k/n$  samples from each of  $n$   
20 different days. Here,  $n$  could take three possible values, namely, 1, 2 or 3 (see Figure 2C, first  
21 column). The number of samples per person,  $k$ , was held constant to enable comparison of  
22 classification accuracy across all values of  $n$ . Irrespective of the extent of aggregation in the training  
23 set, samples in the test-set were never aggregated from different days. Mean identification accuracy  
24 for a particular  $n$ -day aggregation scheme (e.g.,  $^A\mathbf{I}_{d1} \circ ^A\mathbf{I}_{d2} \dots ^A\mathbf{I}_{dn} \rightarrow ^A\mathbf{I}_r$ ) was obtained by (i)  
25 independently estimating the accuracy for each possible training/test-set combination that satisfied  
26 the day constraints (e.g., day  $p \neq$  day  $q \neq$  day  $r$ ) and then (ii) averaging these accuracy values.

1            Cross-task identification: This was treated as a special instance of cross-day identification.  
2     For example, the accuracy for the configuration  ${}^A\mathbf{I}_p \rightarrow {}^B\mathbf{I}_q$  was estimated by replacing the test set  
3     with samples from state  $B$  while retaining all other day-related constraints as in cross-day/same-task  
4     identification. Unless specified otherwise, cross-task identification was always tested across days,  
5     that is, the training and test sets were always from different days. This was done to exclude  
6     potential inter-state similarities that might be present due to the joint preprocessing of data from all  
7     states within the same day (see section 2.5).

#### 8 9     **2.8.4. Classification schemes: Interpretation of accuracy relationships**

10            The same-day accuracy for a particular state was treated as a pre-condition to estimate the  
11     cross-day identification accuracy for that state. If same-day accuracy were greater than random  
12     chance, it would confirm that the distribution from which the training set was drawn contained  
13     sufficient information to allow identification in the absence of potential inter-day changes. Cross-  
14     day accuracy is reported and interpreted here only if this pre-condition was satisfied.

15            Based on this pre-condition, a reduction in cross-day (1-day) accuracy (e.g.,  ${}^A\mathbf{I}_p \rightarrow {}^A\mathbf{I}_q$ )  
16     relative to same-day accuracy (e.g.,  ${}^A\mathbf{I}_p \rightarrow {}^A\mathbf{I}_p$ ) can be attributed to a systematic difference in the  
17     distributions  ${}^A\mathbf{I}_p$  and  ${}^A\mathbf{I}_q$  between days (red arrow, Figure 3A). Aggregation was used to evaluate the  
18     source of this cross-day accuracy reduction by varying the statistical properties of the training set  
19     (i.e., by aggregating samples across days) while holding the properties of the test set constant.  
20     Specifically, we assumed aggregation would lead to decision-rules that discount day-specific  
21     properties in favor of day-general properties. Therefore, depending on the relative roles of day-  
22     specific/general properties in the classification decision, the cross-day accuracy might stay constant,  
23     increase or decrease with increasing aggregation (Figure 3A).

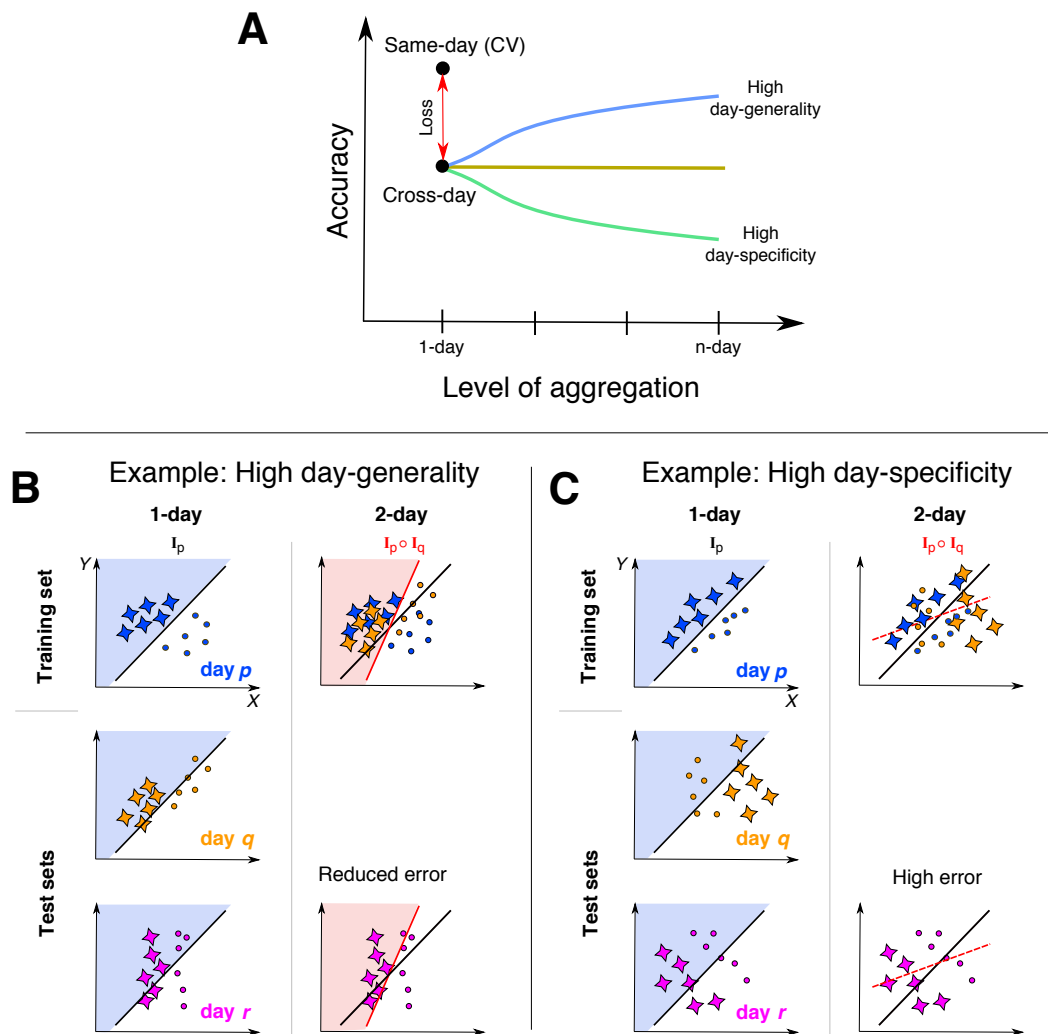

1 **Figure 3: Effect of aggregation.** (A) Schematic of relationship between same-day and cross-day identification  
 2 accuracy. Cross-day (1-day) accuracy can be lower than same-day accuracy (red-arrow) due to day-specificity of the  
 3 decision-rule. Training decision-rules on aggregated samples (y-axis) can change cross-day accuracy, which could  
 4 increase (blue, see panel B), or stay constant (dark green), or even decrease (light green, see panel C). (B) Idealized  
 5 example of how cross-day accuracy (column 1) can increase with aggregation (column 2) due to day-general  
 6 information. Samples from two classes (stars, circles) are shown along two features (day-general:  $X$ , day-specific:  $Y$ )  
 7 with each day's samples shown in different colors ( $p$ : blue,  $q$ : orange,  $r$ : purple). The 1-day decision-rule ( $I_p$ ) (top left  
 8 panel) is depicted with thick black line and shaded areas. This decision-rule can successfully classify samples from days  
 9  $q$  and  $r$  but with some errors. However, a decision-rule trained on data from days  $p$  and  $q$  ( $I_p \circ I_q$ ) (thick red line, red  
 10 shaded area) reduces cross-day classification errors (lower right). (C) Idealized example of high day-specificity. Even  
 11 though the classes are separable within each day, the 1-day decision-rule ( $I_p$ ) has a poor cross-day accuracy (column 1).  
 12 2-day training (column 2) produces a decision-rule with worse classification both on the training set itself (dotted red  
 13 line) as well as across days (lower right).

1            Figures 3B and 3C show idealized examples of how aggregation could both increase as well  
2 as decrease cross-day accuracy. In the example shown in Figure 3B, the two classes systematically  
3 differ on feature  $X$  (x-axis) but with an inconsistent role for feature  $Y$  (y-axis). Due to incidental  
4 day-specific variation, feature  $Y$  has a role in distinguishing the classes on day  $p$  but not on other  
5 days. Consequently, a decision-rule trained on day  $p$  does not effectively separate the classes on  
6 other days (column 1). However, training on aggregation samples from day  $p$  and  $q$  (column 2)  
7 reduces  $Y$ 's role in the aggregated decision-rule leading to an improved separation of the classes  
8 across days. Figure 3C illustrates an extreme example of day-specificity where the two features  
9 have a conjoint relationship allowing classification within each day but with low generality across  
10 days. Therefore, training on samples aggregated from day  $p$  and  $q$  leads to an overall reduction in  
11 accuracy on the training set itself as well across days.

12

### 13 *2.8.5. Weights and normalized weights*

14            The characteristic weights for a particular classification scheme (e.g.,  ${}^A\mathbf{I}_p \rightarrow {}^A\mathbf{I}_q$ ) were  
15 obtained by averaging the weights across all training sets. In a multiclass classifier, the decision-  
16 rules are organized in a winner-take-all competition to label each sample (Figure 2B). Therefore, for  
17 each sample to be uniquely assigned to only one person, the person-specific classifiers in the  
18 ensemble necessarily require different decision-rules. This difference in decision-rules might only  
19 be in the sign (positive/negative) assigned to the weights. Therefore, for all weight-related analyses,  
20 the absolute values of the weights were used in order to allow inter-individual comparisons.

21            To identify the high-consistency weights, the absolute weights were z-scored across all  
22 features for each subject to retain information about inter-feature weight differences in the statistical  
23 tests. However, this “raw” weight measure does not account for power differences. For features  $i$   
24 and  $j$ , the weight  $|w_i|$  might be greater than  $|w_j|$  while the power  $|P_i|$  might be less than  $|P_j|$ .  
25 Consequently, neither the relationship between the weights nor the power are reliable indicators of  
26 the relative influence of  $i$  and  $j$  on the eventual classification decision. Therefore, we defined a

1 feature  $i$ 's unit weight  $\bar{w}_i$  as the idealized weight value such that  $\bar{w}_i P_i = 1$ . The normalized weight  
2 was thus defined as the ratio  $w_i/\bar{w}_i$ , which was effectively equal to  $w_i P_i$ . Due to the characteristic  
3 differences in power between bands, for statistical comparisons, the absolute normalized weights  
4 (i.e.,  $|w \cdot P|$ ) were z-scored within each band for each subject.

5

## 6 **2.9. Statistical Analysis**

7 The relative differences in the accuracy of different classification schemes were assessed by  
8 performing paired t-tests, repeated measures one-way or two-way analysis of variance (ANOVA)  
9 implemented by the pingouin python package (version 0.3.2) (Vallat 2018).

10 The random chance accuracy for the multi-class and standalone binary classifier was 50%  
11 and accuracy deviations from random chance were evaluated with one-sample t-tests. The  
12 Bonferroni threshold was used to correct for multiple comparisons. Due to the sequential  
13 relationship between the different multiclass classification schemes, following Figure 3A, the tests  
14 for same-day accuracy (CV) and cross-day accuracy were planned tests that were considered  
15 significant at a threshold of  $p < 0.05$ . The tests for 2-day and 3-day aggregation were evaluated at a  
16 threshold of  $p < (0.05/2)$ . For tests for the mono-band and mono-location sets, the thresholds were  
17 further corrected for the number of feature sets. Correlations between individual accuracy values  
18 were evaluated using Spearman's rank correlation due to the focus on relative ordering rather than a  
19 strict cardinal relationship.

20 Two kinds of error-bars are used in the plots. For plots depicting variable changes due to a  
21 single-factor, error bars indicate the standard deviation (SD). Plots depicting multi-factor changes  
22 use error bars displaying the within-subject standard error (s.e.m.) (O'Brien and Cousineau 2014).  
23 The type of error-bar used is explicitly noted in the figure caption.



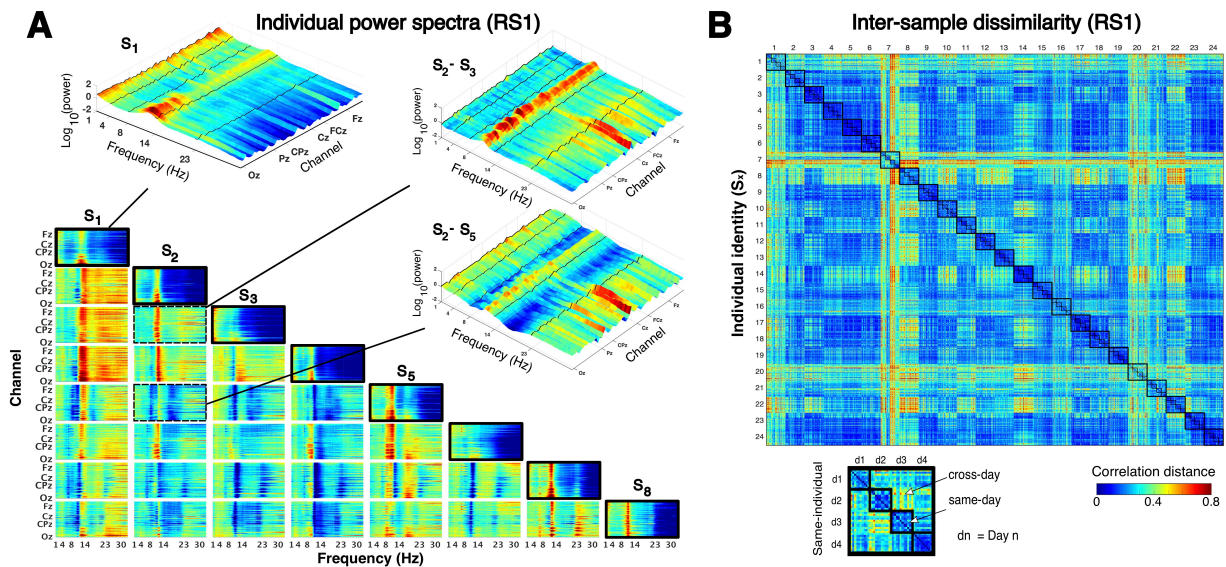

1 **Figure 4: Inter-individual and inter-day differences.** (A) Matrix showing the oscillatory (full) power spectra in *RS1*  
 2 at all channels (averaged across samples and days) for 8 selected individuals ( $S_i$ , diagonal, thick black boundary) and  
 3 their pair-wise differences. The difference in power spectra for each pair of individuals  $S_i$  and  $S_j$  (i.e.,  $S_i - S_j$ ) is shown at  
 4 row  $i$ , column  $j$  of matrix. In each spectrogram, channels have a posterior-to-anterior ordering. Insets show magnified  
 5 view of the power spectrum for  $S_1$  (left upper) and differences for  $S_2 - S_3$  (right upper) and  $S_2 - S_5$  (right lower), with  
 6 frequency band boundaries marked with black lines. (B) Inter-sample dissimilarity matrix for *RS1* (90 samples per  
 7 individual per day, each sample was defined by 305 features = 61 channels x 5 bands). The dissimilarity of two samples  
 8 was defined by their correlation distance ( $= 1 - r$ , where  $r$  is the Pearson's correlation coefficient). Large black squares  
 9 on diagonal contain values from the same individual, and the four smaller squares each contain same-day values.  
 10

## 1 **3. RESULTS**

### 2 **3.1. Face-validity of individual power spectra**

3 Our investigation assumed that an individual's power spectrum at rest can systematically (i)  
4 differ between days, and also (ii) differ from the spectra of other individuals. We first confirmed the  
5 face-validity of these assumptions in our data.

6 The structured inter-individual differences during *RSI* were qualitatively evident from the  
7 mean (full) power spectrum at different channels (Figure 4A) before its reduction to the minimal  
8 description used for the classification analyses. As shown for one example individual  $S_1$ , individual  
9 power spectra had a similar form across channels with a higher power in the  $\delta$  and  $\alpha$  bands and a  
10 higher overall power in the posterior and anterior channels relative to the central channels. These  
11 individual spectra also showed prominent pair-wise differences as illustrated for a few selected  
12 individuals. The diverse varieties of inter-individual differences highlight the difficulty of  
13 representing an individual's unique properties as illustrated for individual  $S_2$ . The combination of  
14 channels and frequencies (i.e., features) at which  $S_2$  and  $S_3$  showed prominent differences were not  
15 the same features at which  $S_2$  differed from  $S_5$ . However, the required decision-rule to identify  $S_2$   
16 was a single feature configuration capable of distinguishing  $S_2$  from *all* others while allowing  $S_2$  to  
17 be re-identified across days, despite inter-day variations.

18 The systematic inter-day differences were evident from the dissimilarity between samples  
19 from all participants and all days (90 samples per participant per day) (Figure 4B). The dissimilarity  
20 between any two samples was described by their correlation distance ( $= 1 - r$ , where  $r$  is the  
21 Pearson's correlation coefficient)(Diedrichsen and Kriegeskorte 2017; Dimsdale-Zucker and  
22 Ranganath 2019; Pani et al. 2020). For all 24 participants, the mean dissimilarity between samples  
23 from the *same day* was lower than between samples from different days (*cross-day*) [ $t_{23} = -6.74$ ,  $p <$   
24  $0.0001$ ]. However, the dissimilarity between same-day and cross-day samples varied from person to  
25 person suggesting their possible confusability with samples from other individuals. This was the

1 critical issue to be resolved with an appropriate decision-rule, to be identified using machine-  
2 learning.

3

## 4 **3.2. Identification of individuals from RS activity within and across days**

### 5 *3.2.1. High same-day accuracy but reduced cross-day accuracy of individual decision-rules*

6 To identify a person from a 2s sample of RS activity with an ensemble classifier, a decision-  
7 rule was numerically estimated to represent each person's unique RS characteristics. The decision-  
8 rules estimated for each day could identify each person (of 24) from a sample acquired on the same  
9 day (i.e., according to the scheme  ${}^{\text{RS1}}\mathbf{I}_p \rightarrow {}^{\text{RS1}}\mathbf{I}_p$ ) with a mean cross-validated (CV) accuracy of  
10  $99.98 \pm 0.04\%$  (mean  $\pm$  sd) that was significantly larger than the theoretically expected accuracy for  
11 random guessing [ $> 50\%$ :  $t_{23} = 5596.13$ ,  $p < 0.00001$ ] (Figure 5A, Table A.1). However, for  
12 longitudinal tracking, a key demand is that decision-rules from one day should identify a person  
13 from samples acquired on a different day (i.e.,  ${}^{\text{RS1}}\mathbf{I}_p \rightarrow {}^{\text{RS1}}\mathbf{I}_q$ ). The same-day decision-rules  
14 identified individuals across days with a mean accuracy of  $92.10\% \pm 6.8\%$  that was higher than  
15 random chance [ $t_{23} = 30.14$ ,  $p < 0.00001$ ] but less accurate than same-day identification by  $\sim 8\%$   
16 [paired  $t_{23} = 5.64$ ,  $p = 0.00001$ ].

17 The confusion matrix (Figure 5B) of how individuals were misclassified during cross-day  
18 (1-day) identification revealed four clusters of individuals who were confused with each other.  
19 Notably, the individuals with the lowest cross-day accuracies (namely,  $S_2$ ,  $S_{11}$ ,  $S_{15}$ ,  $S_{24}$ ) belonged to  
20 different clusters rather than being solely confused with each other. The clustering of misclassified  
21 individuals suggested that errors in identifying an individual  $S_X$  were due to a combination of (i)  
22 changes to  $S_X$ 's RS-activity between days (i.e., false negatives) and (ii) changes to other individuals  
23 who were then misclassified as  $S_X$  (i.e., false positives). Nevertheless, the increased errors in  
24 individual identification illustrate the challenge of  $NP+/NP-$  decisions. Errors in identifying a  
25 person  $S_X$  across days seemingly imply that  $S_X$ 's unique identifying characteristics had changed

1 across days even though the individuals here were unlikely to have changed in their underlying  
2 neurophysiology over the 5-day testing period.

3

### 4 *3.2.2. Aggregated training increases cross-day accuracy*

5 In numerical terms, the cross-day loss in accuracy implies that certain properties of each  
6 day's decision-rules were of predictive relevance to same-day samples but of limited generality to  
7 other days. To discount the role of these day-specific properties in favor of day-general properties,  
8 the decision-rules were trained using samples aggregated from *multiple* days (i.e.,  ${}^{\text{RS1}}\mathbf{I}_p \circ {}^{\text{RS1}}\mathbf{I}_q \dots \rightarrow$   
9  ${}^{\text{RS1}}\mathbf{I}_s$ ) (Figure 5A). The mean cross-day accuracy *increased* from 92.10%  $\pm$  6.8% without  
10 aggregation (1-day) to 95.93  $\pm$  3.63% with 2-day aggregation, with an additional increase to  
11 97.39%  $\pm$  2.65% with 3-day aggregation [one-way ANOVA,  $F_{2,46} = 28.83$ ,  $p < 0.00001$ ]. Following  
12 aggregation, the cross-day accuracy was a mere  $\sim$ 2% lower than the same-day accuracy. The effects  
13 of aggregated training on individual-specific identification errors are shown in Figure 5C. The  
14 decision-rules obtained with 3-day aggregation were associated with fewer false negatives (indexed  
15 by the higher recall score) especially for individuals with the lowest 1-day accuracies, i.e.,  $S_2$ ,  $S_{11}$ ,  
16  $S_{15}$  and  $S_{24}$ . This was associated with interrelated changes in errors in individuals who belonged to  
17 the same cluster. For example, there was a prominent reduction in false positives (indexed by the  
18 higher precision score) for  $S_{17}$  who was in the same cluster  $S_{24}$  and  $S_{23}$  (highlighted in green). The  
19 increased accuracy with aggregation despite the true inter-day differences in RS-activity was  
20 consistent with the presence of *day-general* properties (section 2.8.4, Figure 3).

21

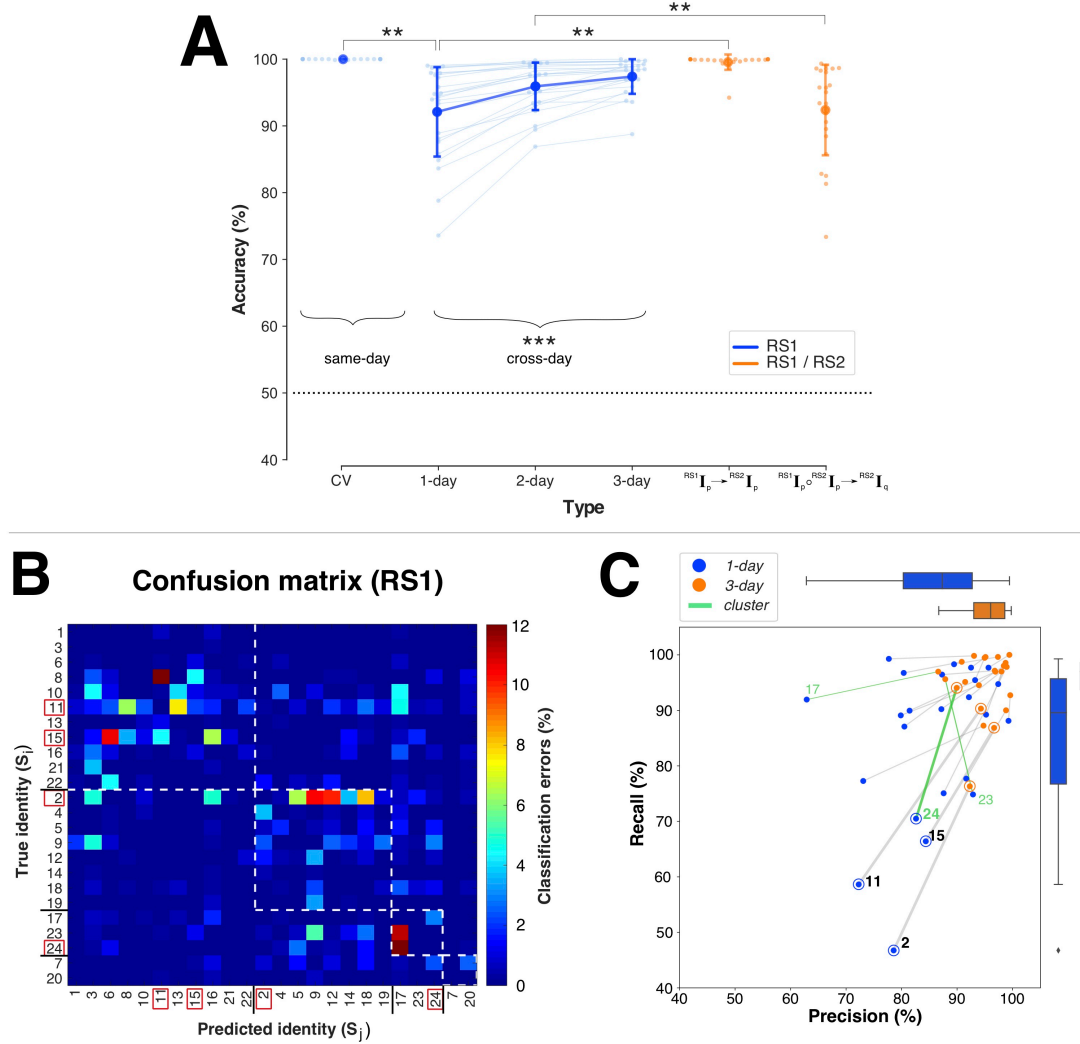

1 **Figure 5: Identification accuracy at rest.** (A) Mean identification accuracy with *RS1* (blue) on same-day (CV), across  
2 days (1-day, 2-day, 3-day), and schemes relating *RS1* and *RS2* (orange). Light colored dots/lines depict individual  
3 accuracies ( $N=24$ ). Horizontal dotted line depicts random chance accuracy (50%). Error bars: SD (\*\* =  $0.00001 \leq p <$   
4  $0.001$ ; \*\*\* =  $p < 0.00001$ ). (B) Confusion matrix for cross-day (1-day) identification (only errors are shown). Dotted  
5 squares indicate clusters of individuals who are more confused with each other. Identities of individuals with the lowest  
6 cross-day accuracies are highlighted with red squares. (C) Changes to precision and recall scores with aggregation for  
7 the whole group (shown with boxplots) and for individuals (1-day: blue dots, 3-day: orange dots). Individuals with  
8 lowest 1-day accuracy are indicated with rings and thick gray lines. Green lines highlight  $S_{24}$ ,  $S_{23}$  and  $S_{17}$  who belong to  
9 the same cluster, shown in (B).

### 1 3.2.3. Cross-day versus cross-measurement identification are not equivalent

2 We next assessed whether the above accuracy relationships across days (with and without  
3 aggregation) was related to a difference in *days* rather than simply a difference in *measurements*.

4 In our experimental protocol (Figure 1A), *RS2* was the second RS measurement on each  
5 day. The effects of aggregation on cross-day identification with *RS1* were successfully replicated on  
6 *RS2* without statistically detectable differences (Table A.1) [two-way ANOVA, Condition {*RS1*,  
7 *RS2*} x Type {1-day, 2-day, 3-day}, Type\*Condition:  $F_{2,46} = 0.56$ ,  $p = 0.57$ ; Type:  $F_{2,46} = 31.31$ ,  $p$   
8  $< 0.00001$ ; Condition:  $F_{1,23} = 0.38$ ,  $p = 0.54$ ]. Importantly, *RS2* validated the *day-specific* properties  
9 of the decision-rules (Figure 5A). Same-day decision-rules from *RS1* classified samples of *RS2*  
10 from the same day ( ${}^{RS1}\mathbf{I}_p \rightarrow {}^{RS2}\mathbf{I}_p$ ) with a mean accuracy of  $99.55 \pm 1.15\%$  that was significantly  
11 greater than the accuracy in classifying *RS1* across days ( ${}^{RS1}\mathbf{I}_p \rightarrow {}^{RS1}\mathbf{I}_q$ ) ( $92.10 \pm 6.84\%$ ) [paired  $t_{23}$   
12  $= 5.19$ ,  $p = 0.00003$ ]. Furthermore, *RS2* validated the importance of aggregating samples from  
13 different days (rather than different measurements) to reduce day-specificity. Decision-rules trained  
14 on aggregated same-day samples from *RS1* and *RS2* ( ${}^{RS1}\mathbf{I}_p \circ {}^{RS2}\mathbf{I}_p \rightarrow {}^{RS1}\mathbf{I}_r$ ) had a *lower* cross-day  
15 accuracy ( $92.38 \pm 6.92\%$ ) than decision-rules trained on aggregated *RS1* samples from two different  
16 days ( ${}^{RS1}\mathbf{I}_p \circ {}^{RS1}\mathbf{I}_q \rightarrow {}^{RS1}\mathbf{I}_r$ ) ( $95.93 \pm 3.63\%$ ) [paired  $t_{23} = -4.83$ ,  $p = 0.00007$ ].

17 In summary, the reduction in cross-day accuracy without aggregation was indicative of  
18 *inter-day* (rather than inter-measurement) variations in RS activity. Despite this inter-day variation  
19 in RS activity, the cross-day accuracy increased with aggregation and further revealed the existence  
20 of *day-general* properties in RS-activity that were unchanged across days. These properties were  
21 consistent with an activity configuration that was putatively defined by individual-specific  
22 neurophysiological constraints.

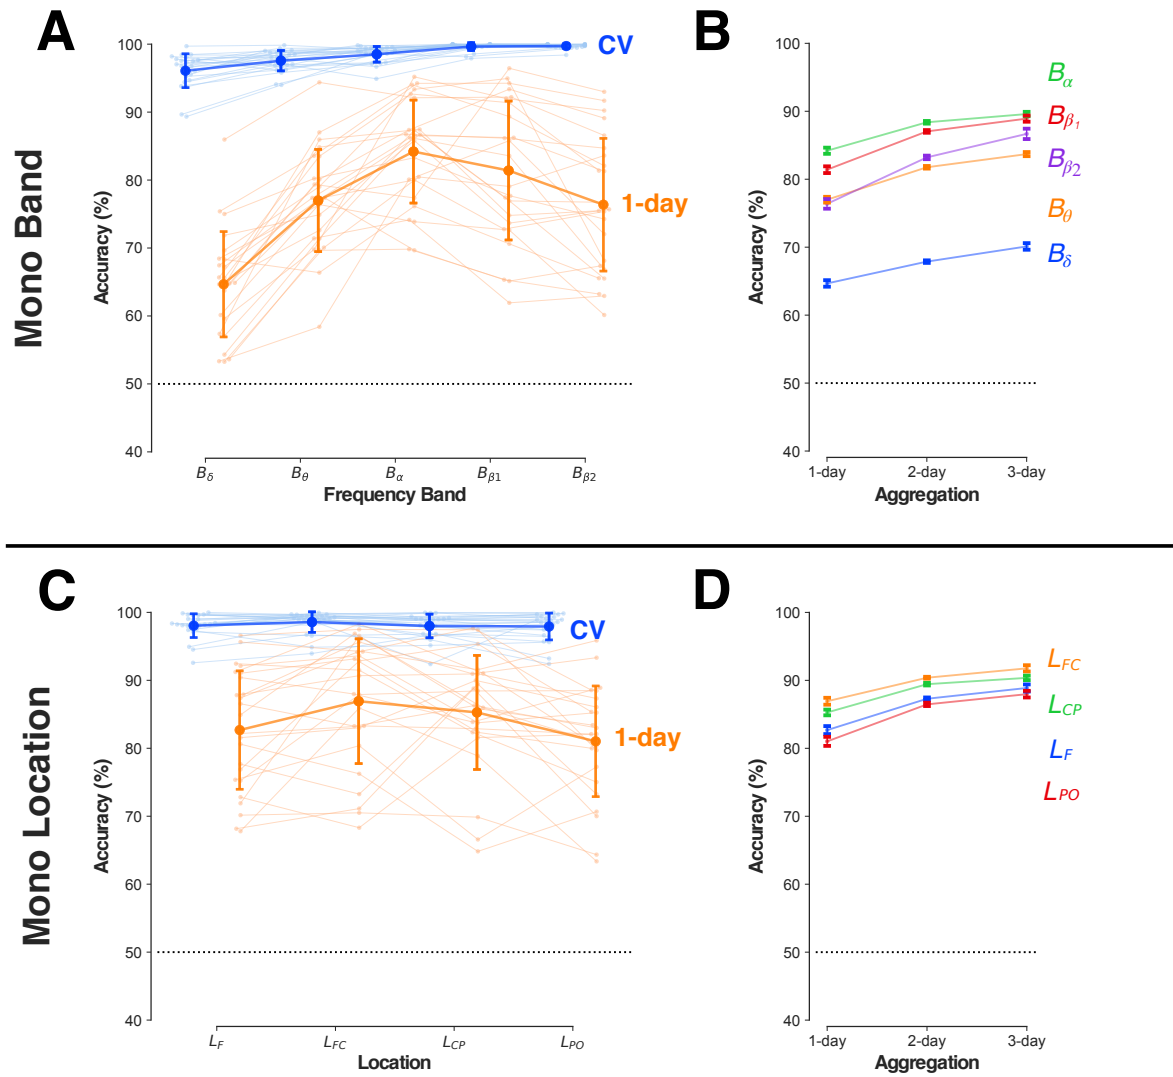

1 **Figure 6: Identification at rest with mono-band/location feature subsets.** (A) Mean identification accuracy for *RSI*  
 2 with mono-band feature sets of increasing frequency (x-axis) on the same-day (blue, CV) and across-days (orange, 1-  
 3 day). Light-colored dots/lines depict individual accuracies ( $N=24$ ). Error bars: SD. (B) Change in cross-day  
 4 identification with increasing aggregation (x-axis) for different mono-band feature subsets (colored lines). Error bars:  
 5 Within-subject s.e.m. (O'Brien and Cousineau 2014). (C) Mean identification accuracy for mono-location feature sets  
 6 (x-axis, from anterior to posterior) with graphical representation and error bars as in panel A. (D) Change in cross-day  
 7 identification with increasing aggregation (x-axis) for different mono-location feature subsets (colored lines). Error  
 8 bars: Within-subject s.e.m. Horizontal dotted lines depicts the random chance accuracy (50%) in all panels.

9

### 1 **3.3. Information organization in resting activity enabling individual identification**

2 The hypothesized configuration in RS-activity was suggestive of a multivariate relationship  
3 between distributed features. However, the accuracy relationships described above do not indicate  
4 whether such a distributed configuration was necessary to enable individual identification.  
5 Therefore, we evaluated the information organization required for individual identification.

#### 6 **3.3.1. Low cross-day identification with information from only one frequency or one location**

7 Each sample was a snapshot of RS activity described by 305 informational features (5 bands  
8 x 61 channels). To test the informational role of these different features, we evaluated whether  
9 identification comparable to the full feature-set was possible with subsets of features that were  
10 defined either by frequency band (i.e., mono-band sets) or spatial location (i.e., mono-location sets).

11 Each *mono-band* feature set ( $B_f$ ) consisted of features from one frequency band  $f$  at all 61  
12 channels. For all five mono-band sets (Figure 6A, Table A.2), same-day identification had a mean  
13 accuracy greater than 95%. However, the size of the cross-day loss in accuracy was band-dependent  
14 and ranged from ~14% for  $B_\alpha$  to nearly ~32% for  $B_\delta$  [ANOVA, Type {CV, 1-day} x Band { $B_\delta$ ,  $B_\theta$ ,  
15  $B_\alpha$ ,  $B_{\beta 1}$ ,  $B_{\beta 2}$ }, Type\*Band:  $F_{4,92} = 24.83$ ,  $p < 0.00001$ ; Type:  $F_{1,23} = 232.11$ ,  $p < 0.00001$ ; Band:  $F_{4,92}$   
16  $= 40.30$ ,  $p < 0.00001$ ]. The divergence in cross-day losses for  $B_\alpha$  and  $B_\delta$  was striking as these two  
17 bands have a characteristically higher power relative to the other bands (Figure 4). Training with  
18 multi-day aggregation (Figure 6B) increased cross-day accuracy by differing amounts for each band  
19 by, for example, +10% for  $B_{\beta 2}$  but only +6% for  $B_\delta$  [ANOVA, Band { $B_\delta$ ,  $B_\theta$ ,  $B_\alpha$ ,  $B_{\beta 1}$ ,  $B_{\beta 2}$ } x Type  
20 {1-day, 2-day, 3-day}, Type\*Band:  $F_{8,184} = 9.19$ ,  $p < 0.00001$ ; Type:  $F_{2,46} = 146.02$ ,  $p < 0.00001$ ;  
21 Band:  $F_{4,92} = 43.13$ ,  $p < 0.00001$ ]. However, even with 3-day aggregation, the residual difference  
22 between cross-day and same-day accuracy (minimum: ~7% for  $B_\alpha$ , maximum: ~26% for  $B_\delta$ ) was  
23 larger than the ~2% difference with the full feature-set.

24 Each *mono-location* feature set ( $L_z$ ) consisted of 50 features (5 bands x 10 channels) in the  
25 spatial zone  $z$  (Figure 2A). The mean same-day accuracy was greater than 95% for all mono-  
26



1 location feature sets (Figure 6C, Table A.2). However, the mean cross-day (1-day) accuracy showed  
2 reductions of ~12%-16% for all locations [ANOVA, Type {CV, 1-day} x Location { $L_F$ ,  $L_{FC}$ ,  $L_{CP}$ ,  
3  $L_{PO}$ }, Type\*Location:  $F_{3,69} = 3.77$ ,  $p = 0.015$ ; Type:  $F_{1,23} = 108.91$ ,  $p < 0.00001$ ; Location:  $F_{3,69} =$   
4  $5.45$ ,  $p = 0.0020$ ]. The mean cross-day accuracy for the fronto-central ( $L_{FC}$ ) and centro-parietal  
5 ( $L_{CP}$ ) sets were marginally higher than for the parieto-occipital ( $L_{PO}$ ) and frontal ( $L_F$ ) sets. This  
6 zonal accuracy difference was notable as the mean power for all bands was typically higher over the  
7 posterior and anterior channels than the centrally located channels (Figure 4A). Aggregation  
8 increased cross-day accuracy by ~6% for all four location sets (Figure 6D) [ANOVA, Location:  
9 { $L_F$ ,  $L_{FC}$ ,  $L_{CP}$ ,  $L_{PO}$ } x Type {1-day, 2-day, 3-day} [Type\*Location:  $F_{6,138} = 2.07$ ,  $p = 0.06$ ; Type:  $F_{2,$   
10  $46 = 115.38$ ,  $p < 0.00001$ ; Location:  $F_{3,69} = 4.79$ ,  $p = 0.0043$ ]. Nevertheless, the residual ~7%-10%  
11 loss in cross-day accuracy was larger than with the full feature-set.

12 In summary, all the mono-band and mono-location sets contained sufficient information to  
13 enable same-day identification with nearly error-free accuracy. However, this information had a low  
14 day-generalizability. Even with aggregation, these feature sets had a much lower cross-day accuracy than  
15 the full feature-set that combined these feature sets together. This is notable with regard to machine  
16 learning algorithms. Generalization accuracy can reduce with an increase in the number of features  
17 (the so called Hughes effect (Campenhout 1978; Sima and Dougherty 2008)). However, here, a  
18 feature set of 305 features showed greater cross-day generalization than small feature-sets of 50/60  
19 features that have comparable same-day cross-validated accuracy. This divergence suggests that the  
20 higher cross-day robustness with the full feature-set involves a role for multivariate relationships  
21 between different frequency bands (i.e., unlike the mono-band subsets) at spatially distributed  
22 channels (i.e., unlike the mono-location subsets). To assess how this multi-feature configuration  
23 was organized, we evaluated the pattern of weights associated with the different features of the full  
24 feature-set.

25

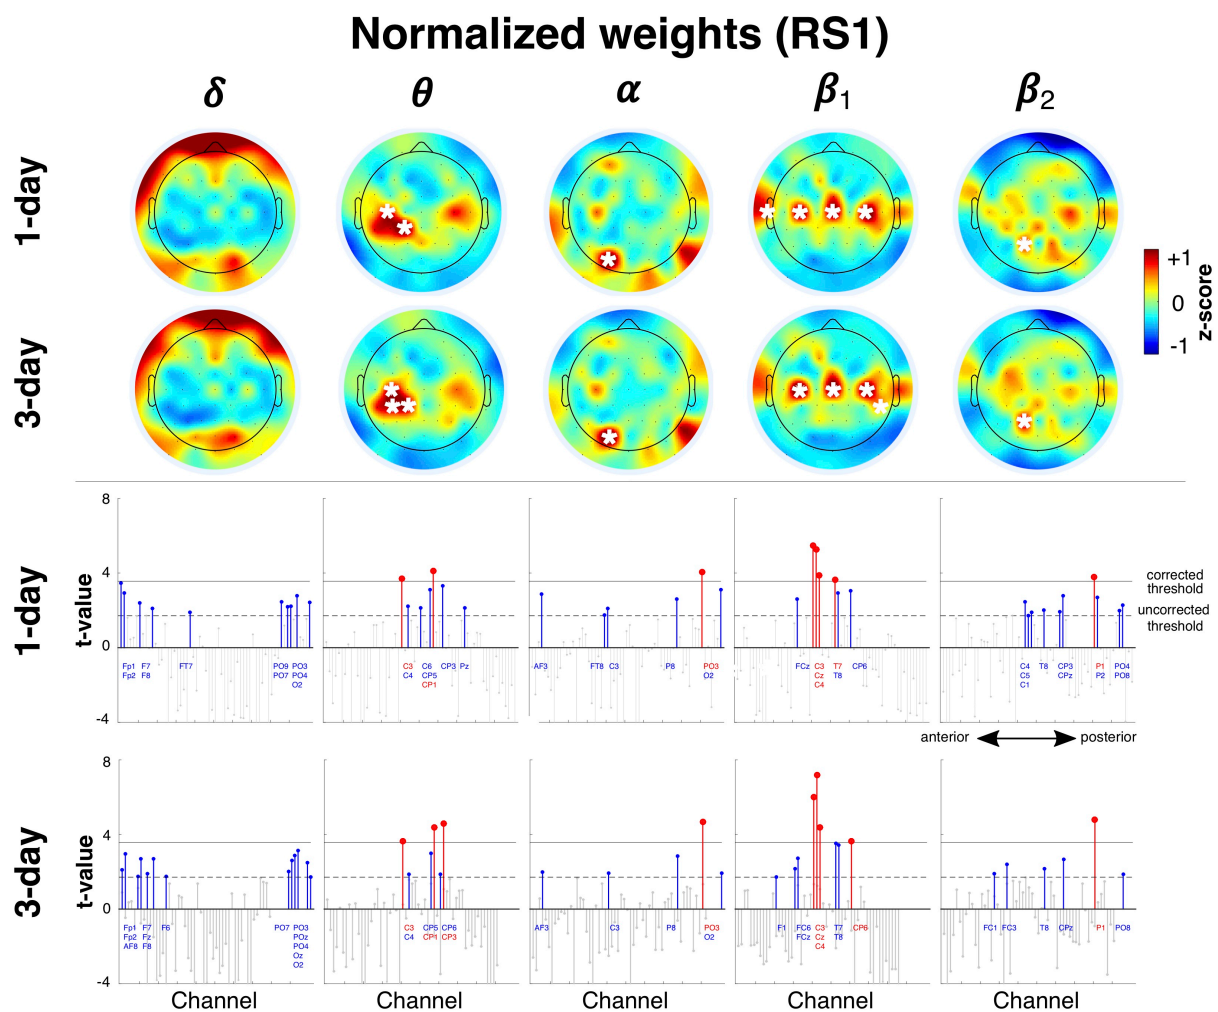

1 **Figure 7: High-consistency features.** Spatial distribution of high-consistency normalized weights for frequency bands  
2 of full feature set (z-scored per band) and their changes with aggregation (1-day, 3-day). Mean weights in each scalp  
3 map that were significantly greater than zero are indicated with a white asterisk ( $p < 0.05/61$ ). Lower two rows show  $t$ -  
4 values for the features corresponding to the upper rows. Channels have an anterior-to-posterior ordering (x-axis). Red  
5 stems indicate channels with  $t$ -values higher than the corrected threshold ( $p < 0.05/61$ , horizontal black line) while blue  
6 stems show channels that only pass uncorrected thresholds ( $p < 0.05$ , dotted horizontal line). Colored channel labels are  
7 grouped from top-to-bottom for visibility and correspond to stems from left to right.

### 1 *3.3.2. Concentration of high-consistency features at fronto-central and occipital zones*

2 Each individual's linear decision-rule was defined by the configuration of weights assigned  
3 to the different features, where weights with a larger magnitude (irrespective of sign) have a larger  
4 role in the classification decision even if in an indirect manner (Haufe et al. 2014; Schrouff and  
5 Mourao-Miranda 2018). However, individual-specific weight configurations might differ from each  
6 other in an idiosyncratic manner with little consistency between individuals since, for example, a  
7 high-weighted feature in  $S_X$ 's decision-rule might be of limited relevance to individual  $S_Y$ 's  
8 decision-rule.

9 Figure 7 shows the topographic distribution of high-consistency features in the full feature-  
10 set after normalization for power differences (see Suppl. Figure 1 for high-consistency non-  
11 normalized (raw) weights). At corrected thresholds (see  $t$ -values in Figure 7, lower panels), the  
12 features associated with all frequency bands except the  $\delta$  band contained at least one high-  
13 consistency feature. Rather than having an idiosyncratic organization, the high-consistency features  
14 were concentrated at distinctive zones in each frequency band.

15 In  $B_\theta$ , there was a concentration of high consistency features at CP1 and C3, with the  
16 addition of CP3 with aggregation. There was a similar, although weaker, concentration of consistent  
17 features at corresponding channels over the right hemisphere. Showing a similar spatial  
18 organization, the high-consistency features in  $B_{\beta_1}$  showed a striking bilaterally symmetric  
19 configuration along the transverse midline at channels C3, Cz and C4 with an aggregation-  
20 modulated role for CP6 and T7 (and possibly T8). This similarity in organization was notable since  
21 the frequency ranges of the  $\theta$  band (4-7.5 Hz) and  $\beta_1$  (14-22.5 Hz) were not contiguous and were  
22 separated by the  $\alpha$  band.

23 Unlike this central concentration of features in  $B_{\beta_1}$  and  $B_\theta$ , the features in  $B_\alpha$  contained a  
24 single, strongly consistent feature in the occipital zone at PO3. At uncorrected thresholds, there  
25 were other distributed features across the scalp that were weakly consistent for both 1-day and 3-  
26 day identification, namely, at AF3, C3, P8 and O2. Similarly, the features of the high-frequency  $\beta_2$

1 band (i.e.,  $B_{\beta 2}$ ) only had a single consistent feature at P1 with a diffuse distribution of consistent  
2 features at uncorrected thresholds.

3 In general, the distribution of high-consistency features was by itself not a simple indicator  
4 of their contribution to cross-day accuracy. For example, the relative number of high-valued  
5 weights in the different bands and spatial locations had a low correspondence to relative accuracy of  
6 cross-day identification based solely on the mono-band/location subsets (see Supplementary Figure  
7 2). Nevertheless, the organized distribution of high-consistency features at channels over the  
8 sensorimotor cortex and the occipital cortex was prima facie support for an individual-specific  
9 configuration with a basis in neurophysiological constraints. The relevance of the high-consistency  
10 zones was of particular interest to the relationship of *RSI* to the non-rest task states where the power  
11 over the sensorimotor and occipital zones was expected to differ from *RSI*.

12

### 13 **3.4. Relationship of rest to non-rest states**

14 The behavioral demands during *TapMov* and *SeqMov* were designed to modulate the  
15 cognitive states during the *TapWait* and *SeqWait* periods and produce neural activity deviations  
16 from *RSI* in the absence of behavioral differences. Furthermore, the *Tap* and *Sequence* tasks were  
17 designed to elicit neural states that varied between days for *Sequence* (low cross-day similarity) but  
18 remained constant for *Tap* (high cross-day similarity). We sought to first explicitly verify that such  
19 deviations from *RSI* were indeed present. Note that all analyses of *Tap* and *Seq* states were  
20 performed in a subgroup of  $N=18$  participants (see section 2.6).

21

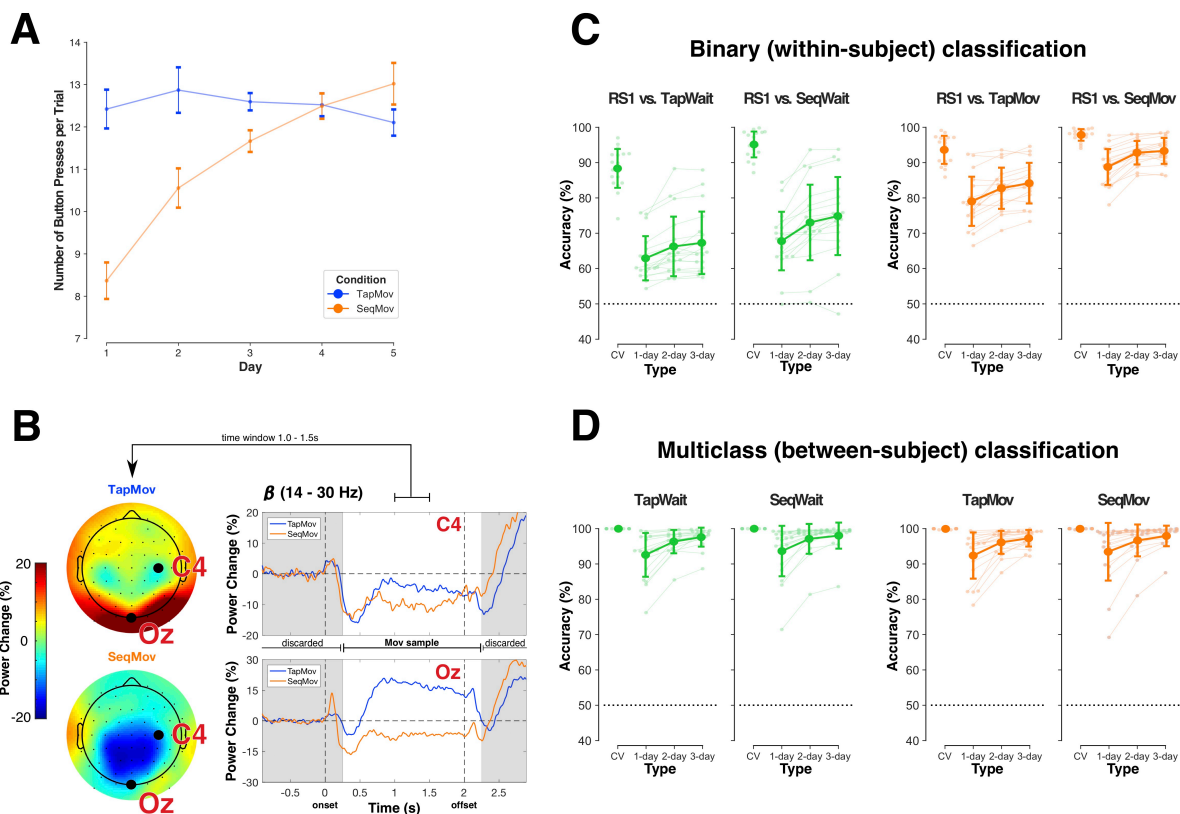

1 **Figure 8: Difference between *RSI* and task-states.** (A) Change in behavior indexed by mean number of button-  
2 presses across days (x-axis) during *TapMov* (blue) and *SeqMov* (orange). Error bars: Within-subject s.e.m. (B)  
3 Movement-related power dynamics in the  $\beta$  band (14-30 Hz) in *TapMov* (blue) and *SeqMov* (orange) at channels C4  
4 (upper right) and Oz (lower right) averaged across participants and days. Intervals marked in gray were discarded from  
5 the *TapWait* and *SeqWait* samples used for classification to avoid movement-related carry over effects into the waiting  
6 periods. Scalp plots (left panel) show the mean power distribution over the period [+1s, +1.5s] following onset of the  
7 movement cue. (C) Same-day/cross-day accuracy in distinguishing *RSI* vs pseudo-rest states (green) and *RSI* vs  
8 movement states (orange) using within-subject binary classifiers. Cross-day differences to *RSI* were lowest for *TapWait*  
9 (far left) and highest for *SeqMov* (far right). Error bars: SD. (D) Person identification accuracy (multiclass) when the  
10 training/test sets were from the same task state (green: pseudo-rest states, orange: movement states). Error bars: SD.

11

### 1 *3.4.1. Neural activity during Tap and Sequence verifiably deviate from RSI*

2 The inter-day changes in behavior during the *TapMov* and *SeqMov* periods were consistent  
3 with the experimental assumptions (Figure 8A). During *TapMov*, the mean number of button  
4 presses per trial (~12-13) remained effectively constant across days [one-way ANOVA,  $F_{4, 68} =$   
5  $0.55$ ,  $p = 0.70$ ]. In contrast, during *SeqMov*, the mean number of button-presses increased from ~8  
6 on the first day to ~13 on the fifth day [one-way ANOVA,  $F_{4, 68} = 21.36$ ,  $p < 0.00001$ ]. This inter-  
7 day change in motor performance in *SeqMov* was systematically different from *TapMov* as  
8 confirmed by the statistically significant interaction in an ANOVA with factors Condition  
9  $\{TapMov, SeqMov\} \times Days \{D1, \dots, D5\}$  [Condition\*Days:  $F_{4, 68} = 12.38$ ,  $p < 0.00001$ ; Condition:  $F_{1,$   
10  $17 = 3.13$ ,  $p = 0.095$ ; Days:  $F_{4, 68} = 10.71$ ,  $p < 0.00001$ ].

11 The neural state during the movement-period (*TapMov*, *SeqMov*) showed typically expected  
12 dynamic states (Figure 8B). Changes in the mean  $\beta$  power at channel C4 (contralateral to the moved  
13 fingers) were in line with the Event-Related De-synchronization/Synchronization (ERD/ERS)  
14 phenomenon for repetitive movements (Pfurtscheller and Lopes da Silva 1999; Cassim et al. 2000;  
15 Alegre et al. 2004; Erbil and Ungan 2007), namely, a power reduction at the onset of movement  
16 execution (i.e., ERD) with an increase after the termination of all movements (i.e., ERS).  
17 Furthermore, the  $\beta$  power changes at Oz showed a task-dependent neural response consistent with  
18 differing visual stimulation, that is, an increase for *TapMov* (blank screen) but a decrease for  
19 *SeqMov* (image depicting the sequence). These movement-vs-wait differences were validated in the  
20 samples used for classification. A within-subject binary classification of *TapWait* vs *TapMov* had a  
21 mean cross-validated accuracy of  $85.91 \pm 7.23\%$  [ $> 50\%$ :  $t_{17} = 21.06$ ,  $p < 0.00001$ ]; and *SeqWait* vs  
22 *SeqMov* had a mean CV accuracy of  $94.58 \pm 3.20\%$  [ $> 50\%$ :  $t_{17} = 59.02$ ,  $p < 0.00001$ ].

23 The critical verification for our study was the relationship between *RSI* and the pseudo-rest  
24 states (*TapWait*, *SeqWait*). Samples from *TapWait* and *SeqWait* were distinguishable from *RSI* on  
25 the same day with high cross-validated accuracy (*RSI* vs *TapWait*:  $88.28 \pm 5.70\%$ ; *RSI* vs *SeqWait*:  
26  $95.12 \pm 3.74\%$ ) (Figure 8C left panels, Table A.3). However, the cross-day accuracy (without

1 aggregation) for both *RSI* vs *TapWait* ( $62.91 \pm 6.44\%$ ) and *RSI* vs *SeqWait* ( $67.79 \pm 8.53\%$ ) was  
2 substantially lower than the same-day accuracy by more than  $\sim 25\%$ . Nevertheless, the cross-day  
3 accuracy for *RSI* vs *SeqWait* was marginally higher than for *RSI* vs *TapWait* with increasing  
4 aggregation [ANOVA: Condition {*RSI* vs *TapWait*, *RSI* vs *SeqWait*} x Type {1-day, 2-day, 3-  
5 day}, Condition\*Type:  $F_{2,34} = 6.22$ ,  $p = 0.005$ ; Condition:  $F_{1,17} = 8.37$ ,  $p = 0.01009$ ; Type:  $F_{2,34} =$   
6  $38.89$ ,  $p < 0.00001$ ].

7 *TapMov* and *SeqMov* were also distinguishable from *RSI* on the same-day with high (cross-  
8 validated) accuracy (*RSI* vs *TapMov*:  $93.56 \pm 4.12\%$ ; *RSI* vs *SeqMov*:  $97.81 \pm 1.76\%$ ) (Figure 8C,  
9 right panel, Table A.3). Similar to the wait periods, the cross-day accuracy for *RSI* vs *SeqMov* was  
10 higher than for *RSI* vs *TapMov* across aggregation levels [ANOVA: Condition {*RS* vs *TapMov*,  
11 *RSI* vs *SeqMov*} x Type {1-day, 2-day, 3-day}, Condition\*Type:  $F_{2,34} = 0.61$ ,  $p = 0.55$ ; Condition:  
12  $F_{1,17} = 30.91$ ,  $p = 0.00003$ ; Type:  $F_{2,34} = 69.47$ ,  $p < 0.00001$ ].

13 The above findings verified the neural activity differences in the task-states in *Tap* and  
14 *Sequence* to each other and to *RSI*. Crucially, the structure of the same-day differences had a low  
15 cross-day generality.

16

### 17 *3.4.2. Robust identification of individuals from Tap and Sequence activity within and across days*

18 The above differences between task-states and *RSI* raised the issue of whether the task-  
19 related functional states also disrupt the information that enables individual identification with *RSI*.  
20 To assess this possibility, we evaluated whether the different *Tap* and *Sequence* task-states  
21 contained sufficient information for person identification in a same-task classification scheme (i.e.,  
22 with the scheme  ${}^X\mathbf{I}_p \rightarrow {}^X\mathbf{I}_q$  for task *X*) (Figure 8D).

23 The same-day accuracy for both *TapWait* and *SeqWait* was  $\sim 99\%$  (Figure 8D left panels,  
24 Table A.1). The mean cross-day accuracy (without aggregation) for *TapWait* ( $92.58 \pm 6.39\%$ ) was  
25 lower than its corresponding same-day accuracy by only  $\sim 7\%$  [ $t_{17} = 4.92$ ,  $p = 0.00013$ ]. Similarly,  
26 for *SeqWait*, the mean cross-day (1-day) ( $93.67 \pm 7.35\%$ ) accuracy was lower than the same-day

1 accuracy by ~6% [ $t_{17} = 3.65$ ,  $p = 0.00197$ ]. Furthermore, the effect of aggregation on mean cross-  
2 day accuracy for *TapWait* and for *SeqWait* were statistically indistinguishable [ANOVA: Condition  
3 {*TapWait*, *SeqWait*} x Type {1-day, 2-day, 3-day} [Condition\*Type:  $F_{2, 34} = 0.88$ ,  $p = 0.42$ ;  
4 Condition:  $F_{1,17} = 1.35$ ,  $p = 0.26$ ; Type:  $F_{2, 34} = 21.30$ ,  $p < 0.00001$ ].

5 Despite the deviations of *TapMov* and *SeqMov* along both the behavioral and cognitive  
6 dimensions of rest and their differences with each other, the accuracies of individual identification  
7 across days for *TapMov* and *SeqMov* were greater than 90% for all levels of aggregation and were  
8 not statistically distinguishable from each other (Table A.1, Figure 8D right panels) [ANOVA:  
9 Condition {*TapMov*, *SeqMov*} x Type {1-day, 2-day, 3-day} [Condition\*Type:  $F_{2, 34} = 0.86$ ,  $p =$   
10  $0.43$ ; Condition:  $F_{1, 17} = 1.26$ ,  $p = 0.28$ ; Type:  $F_{2, 34} = 14.50$ ,  $p = 0.00003$ ].

11 Thus, individual identification was robustly possible in the task states despite their  
12 differences to *RSI*. Furthermore, the identification accuracy was similar between the *Tap* and *Seq*  
13 states despite their functional differences. Two further lines of evidence supported the possibility  
14 that these similarities were based on common task-independent properties. The spatial distribution  
15 of high-consistency features for these states (Figure 9A, Suppl. Figure 3) exhibited a striking  
16 qualitative similarity to each other as well as to the corresponding distribution for *RSI* (Figure 7).  
17 Additionally, the individual cross-day (1-day) accuracy in these task states showed a striking  
18 correlation to the corresponding cross-day accuracy in *RSI* (Figure 9B)[threshold:  $p < 0.05/4$ ;  
19 *TapWait*:  $r(17)=0.882$ ,  $p < 0.00001$ ; *SeqWait*:  $r(17)=0.635$ ,  $p = 0.00466$ ; *TapMov*:  $r(17)=0.75$ ,  $p =$   
20  $0.00034$ ; *SeqMov*:  $r(17)=0.653$ ,  $p = 0.00329$ ]. Thus, the inter-individual relationships revealed by  
21 the errors in cross-day classification during *RSI* (Figure 5B) seemingly extended to these non-rest  
22 states as well. We next turned to a formal assessment of this cross-task relationship.

23



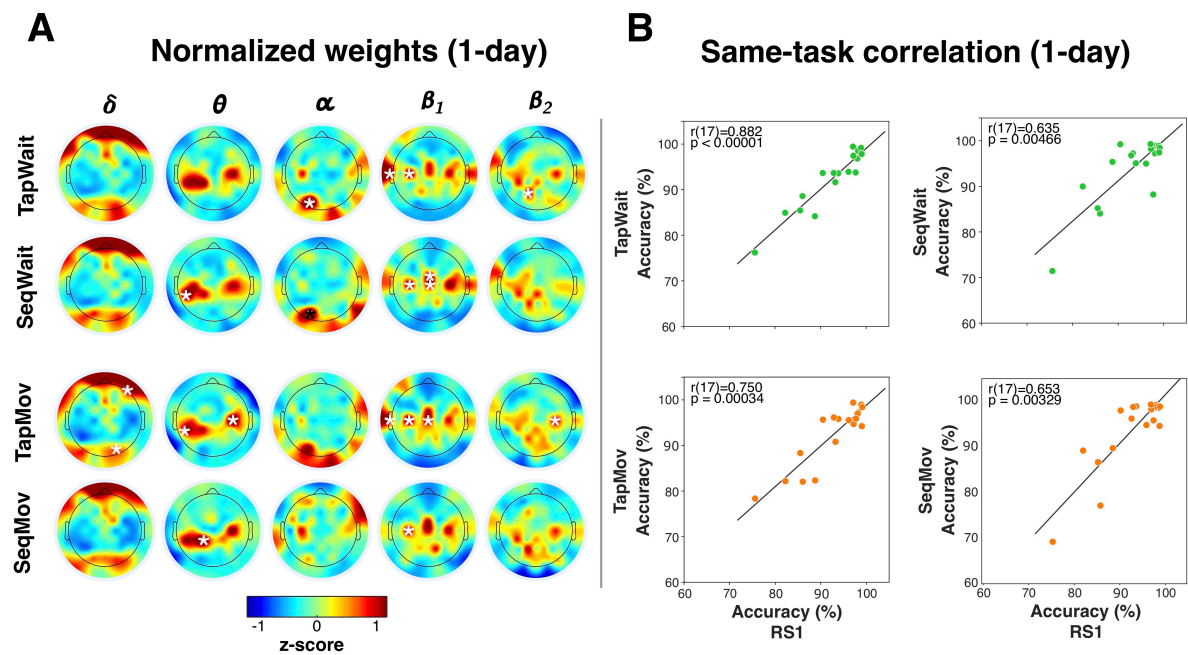

1 **Figure 9: Inter-task relationships.** (A) Spatial distribution of high-consistency features in different task-states  
2 (absolute, z-scored) for 1-day decision-rules (without aggregation). Weights in each scalp map that were significantly  
3 greater than zero are indicated with a white asterisk ( $p < 0.05/61$ , see Supplementary Figure 3). Each frequency band  
4 (column) had a characteristic spatial distribution of high weighted channels that was qualitatively similar across task-  
5 states and also to *RSI* (Figure 7). (B) Scatter plots of cross-day (1-day) identification accuracy in *RSI* to the  
6 corresponding same-task accuracy in the pseudo-rest states (upper row) and movement states (lower row). Each dot  
7 represents one individual. Correlations were assessed with Spearman's rank order correlation (threshold:  $p < 0.05/4$ ).  
8

### 1 **3.5. Generalization of rest-based decision to cross-task individual identification**

2 If person identification with *RSI* was based on a neural configuration related to an  
3 individual's neurophysiological state then identification should be possible despite cognitive state  
4 variations. Therefore, decision-rules trained on *RSI* should be capable of accurate person  
5 identification with samples acquired from the pseudo-rest states (*TapWait* and *SeqWait*) and the  
6 movement states (*TapMov* and *SeqMov*).

#### 8 *3.5.1. Robust cross-task identification with RSI with full feature-set*

9 We used the cross-task scheme  ${}^{RSI}\mathbf{I}_p \rightarrow {}^X\mathbf{I}_q$  to test the invariance of *RSI*-based identification  
10 to inter-day cognitive state variations (i.e., task states  $X$ ) (Figure 10A, Table A.4). Increasing  
11 deviations from *RSI* solely due to cognitive state differences ( $X = \{RSI, TapWait, SeqWait\}$ ) did  
12 not produce comparable, statistically distinguishable reductions in mean identification accuracy  
13 (*RSI*:  $92.79 \pm 6.76\%$ , *TapWait*:  $91.90 \pm 6.46\%$ ; *SeqWait*:  $90.81 \pm 7.09\%$ ) [one-way ANOVA,  $F_{2,34}$   
14 = 2.06,  $p = 0.14$ ]. However, increasing deviations from *RSI* due to cognitive and behavioral state  
15 differences ( $X = \{RSI, TapMov, SeqMov\}$ ) produced significant reductions in identification  
16 accuracy most notably for *SeqMov* (*TapMov*:  $88.79 \pm 7.57\%$ ; *SeqMov*:  $83.85 \pm 10.35\%$ )[one-way  
17 ANOVA,  $F_{2,34} = 14.07$ ,  $p = 0.00004$ ].

18 To disentangle the role of cross-task from cross-day effects, we compared cross-task  
19 ( ${}^{RSI}\mathbf{I}_p \rightarrow {}^X\mathbf{I}_q$ ) and same-task identification ( ${}^X\mathbf{I}_p \rightarrow {}^X\mathbf{I}_q$ ) across days (Table A.1, 4). For the pseudo-rest  
20 states ( $X = \{TapWait, SeqWait\}$ ), cross-task accuracy with *RSI* decision-rules produced a small but  
21 statistically significant reduction relative to same-task identification [ANOVA, Train  $\{RSI, Same\}$   
22 x Condition  $\{TapWait, SeqWait\}$ , Train\*Condition:  $F_{1,17} = 4.14$ ,  $p = 0.06$ ; Train:  $F_{1,17} = 10.02$ ,  $p =$   
23  $0.00566$ ; Condition:  $F_{1,17} = 0.00001$ ,  $p = 1.00$ ]. The cross-task accuracy reduction was significantly  
24 larger for the movement-states ( $X = \{TapMov, SeqMov\}$ ) with a larger loss for *SeqMov* [ANOVA,  
25 Train $\{RS, Same\}$  x Condition  $\{TapMov, SeqMov\}$ , Train\*Condition:  $F_{1,17} = 9.15$ ,  $p = 0.00764$ ;  
26 Train:  $F_{1,17} = 43.94$ ,  $p < 0.00001$ ; Condition:  $F_{1,17} = 2.51$ ,  $p = 0.13$ ].

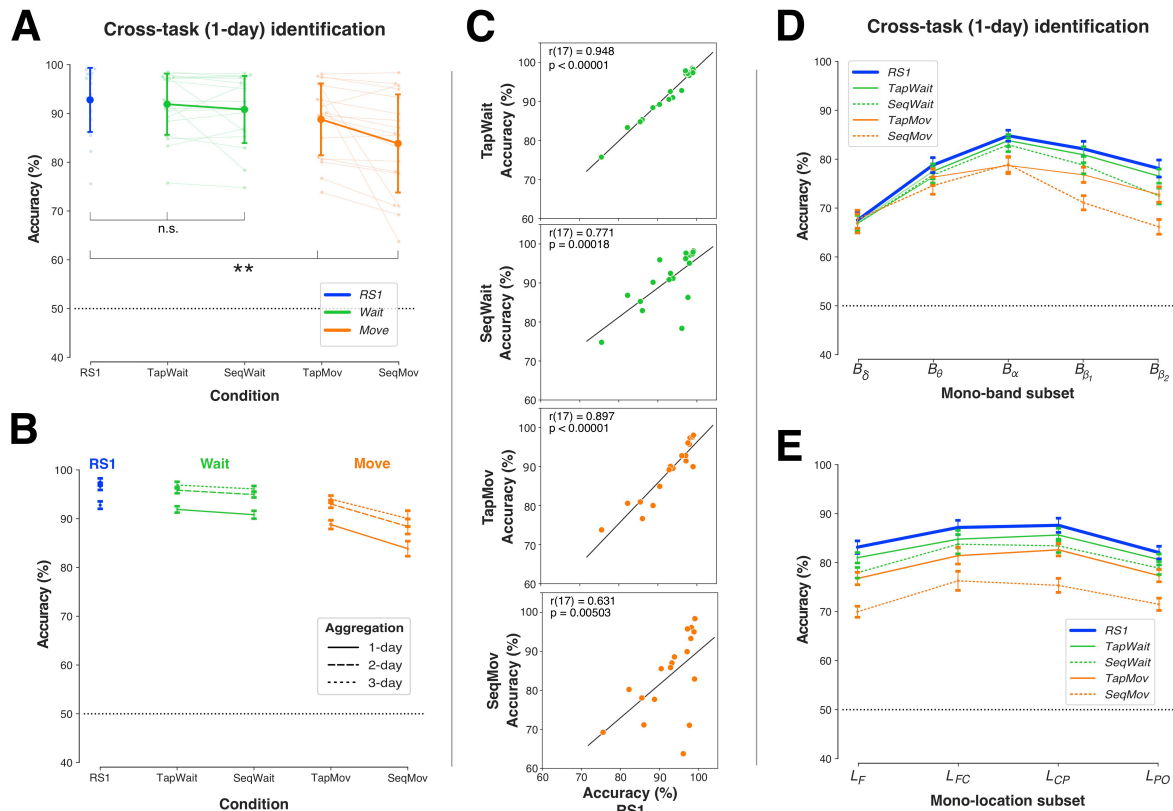

1 **Figure 10: Cross-task identification with RS1.** (A) Mean accuracy of decision-rules trained on *RS1* (1-day) and tested  
2 across days on *RS1* (blue), pseudo-rest states (green) and movement states (orange). Light colored dots/lines indicate  
3 individual accuracies. Error bars: SD. Accuracy differences between *RS1* and pseudo-rest states were not statistically  
4 significant (n.s.), but were between *RS1* and movement states (\*\* =  $0.00001 \leq p < 0.001$ ). (B) Decision-rules trained on  
5 *RS1* with different levels with aggregation (dotted lines) increased cross-day accuracy for all task-states. Error bars:  
6 Within-subject s.e.m. (C) Scatter plots of cross-day (1-day) accuracy in *RS1* to the corresponding cross-task accuracy in  
7 all non-rest tasks. Each dot represents one individual. Correlations were assessed with Spearman's rank order  
8 correlation (threshold:  $p < 0.05/4$ ). (D) Cross-task/day accuracy of *RS1* with mono-band subsets. Deviations from cross-  
9 day accuracy for *RS1* were larger for the movement states (orange) than the pseudo-rest states (green) and deviations  
10 increased with the frequency (lowest for  $B_{\delta}$ , highest for  $B_{\beta_2}$ ). Error bars: Within-subject s.e.m. (E) Cross-task/day  
11 accuracy of *RS1* with mono-location subsets. Deviations from *RS1* were larger for movement states (orange) than  
12 pseudo-rest states (green). Error bars: Within-subject s.e.m.

1 To disentangle the role of day-specificity in  ${}^{RSI}\mathbf{I}_p \rightarrow {}^X\mathbf{I}_q$ , we used multi-day aggregation  
2 ( ${}^{RSI}\mathbf{I}_p \circ {}^{RSI}\mathbf{I}_q \dots \rightarrow {}^X\mathbf{I}_r$ ). Although aggregation reduced day-specificity with *RSI* (Figure 5), it could  
3 nevertheless increase specificity to the properties of *RSI*. If so, aggregation might lower the  
4 accuracy of cross-task identification. Contrary to this possibility, aggregation *increased* cross-task  
5 accuracy to the pseudo-rest states (*TapWait*, *SeqWait*) in a comparable manner to same-task  
6 accuracy (Figure 10B) [ANOVA: Condition {*RSI*, *TapWait*, *SeqWait*} x Type {1-day, 2-day, 3-  
7 day} [Condition\*Type:  $F_{4, 68} = 0.52$ ,  $p = 0.72$ ; Condition:  $F_{2, 34} = 2.44$ ,  $p = 0.10$ ; Type:  $F_{2, 34} =$   
8  $21.63$ ,  $p < 0.00001$ ]. This was particularly striking because aggregation (i.e., related to day-  
9 specificity) produced a relatively larger increase in cross-task accuracy than a change in task-  
10 specificity. Following aggregation, the mean residual cross-task/day accuracy loss relative to same-  
11 task/day identification with *RSI* was only ~3%. Aggregation also *increased* cross-task accuracy to  
12 the movement states (*TapMov*, *SeqMov*) [ANOVA: Condition {*RSI*, *TapMov*, *SeqMov*} x Type {1-  
13 day, 2-day, 3-day} [Condition\*Type:  $F_{4, 68} = 1.35$ ,  $p = 0.26$ ; Condition:  $F_{2, 34} = 13.04$ ,  $p = 0.00006$ ;  
14 Type:  $F_{2, 34} = 29.33$ ,  $p < 0.00001$ ]. Following aggregation, the mean residual cross-task/day  
15 difference was less than ~10% for the movement states.

16 Similar to the same-task correlations described above (section 3.4.2, Figure 9B), the  
17 individual *cross-task* (1-day) accuracy in each of these task states showed a statistical significant  
18 correlation to the corresponding cross-day accuracy in *RSI* (Figure 10C)[threshold:  $p < 0.05/4$ ;  
19 *TapWait*:  $r(17)=0.948$ ,  $p < 0.00001$ ; *SeqWait*:  $r(17)=0.771$ ,  $p = 0.00018$ ; *TapMov*:  $r(17)=0.897$ ,  
20  $p < 0.00001$ ; *SeqMov*:  $r(17)=0.631$ ,  $p = 0.00503$ ]. The correlation coefficients were particularly high  
21 for both *Tap* states (*TapWait* and *TapMov*) as compared to the *Seq* states (*SeqWait* and *SeqMov*),  
22 Furthermore, the scatter plots suggested that the relatively lower cross-task/day accuracy for  
23 *SeqMov* was driven by the low generalization of a few individuals.

24 In summary, decision-rules trained on *RSI* on a single day could identify individuals from  
25 samples from states that verifiably differed from *RSI* to differing extents. Importantly, aggregated

1 training solely on *RSI* lead to *increases* in identification accuracy on samples from these non-rest  
2 task states.

3

### 4 *3.5.2. Low cross-task identification with feature subsets*

5 The full-feature set has a crucial role in limiting the cross-day loss in accuracy in *RSI*  
6 (Figure 6). Applying the cross-task scheme  ${}^{RSI}\mathbf{I}_p \rightarrow {}^X\mathbf{I}_q$  to the mono-band (Figure 10D) and mono-  
7 location (Figure 10E) feature sets provided further evidence of the importance of the full feature-set  
8 to enable robust cross-task identification.

9 For the mono-band feature sets (Figure 10D), increasing deviations from *RSI* in cognitive  
10 state ( $X = \{RSI, TapWait, SeqWait\}$ ) lead to state-related accuracy reductions that were also larger  
11 for the higher frequency bands [ANOVA: Condition  $\{RSI, TapWait, SeqWait\} \times$  Band  $\{B_\delta, B_\theta, B_\omega,$   
12  $B_{\beta1}, B_{\beta2}\}$  [Condition\*Band:  $F_{8, 136} = 2.60, p = 0.01136$ ; Condition:  $F_{2, 34} = 6.44, p = 0.00426$ ; Band:  
13  $F_{4, 68} = 18.36, p < 0.00001$ ]. In a similar manner, increasing deviations from *RSI* for the movement  
14 states ( $X = \{RSI, TapMov, SeqMov\}$ ) produced state-related accuracy reductions that were greater  
15 for *SeqMov* than for *TapMov* particularly at the higher frequencies [ANOVA: Condition  $\{RSI,$   
16  $TapMov, SeqMov\} \times$  Band  $\{B_\delta, B_\theta, B_\omega, B_{\beta1}, B_{\beta2}\}$  [Condition\*Band:  $F_{8, 136} = 8.95, p < 0.00001$ ;  
17 Condition:  $F_{2, 34} = 20.59, p < 0.00001$ ; Band:  $F_{4, 68} = 12.16, p < 0.00001$ ]. These task-linked  
18 accuracy reductions were notably absent at  $B_\delta$ .

19 The pattern of cross-task accuracy deviation from *RSI* took a different form for the mono-  
20 location feature sets (Figure 10E). For the pseudo-rest states ( $X = \{RSI, TapWait, SeqWait\}$ ),  
21 increasing deviations from *RSI* lead to increasing accuracy reductions (largest for *SeqWait*) that  
22 were relatively uniform at all the locations [ANOVA: Condition  $\{RSI, TapWait, SeqWait\} \times$   
23 Location  $\{L_F, L_{FC}, L_{CP}, L_{PO}\}$  [Condition\*Location:  $F_{6, 102} = 0.98, p = 0.45$ ; Condition:  $F_{2, 34} = 8.99,$   
24  $p = 0.00073$ ; Location:  $F_{3, 51} = 4.34, p = 0.00849$ ]. This pattern of reduction was similar for the  
25 movement states ( $X = \{RSI, TapMov, SeqMov\}$ ), where deviations from *RSI* lead to accuracy  
26 reductions that were largest for *SeqMov* and relatively uniform at all locations [ANOVA: Condition

1 {*RSI*, *TapMov*, *SeqMov*} x Location { $L_F$ ,  $L_{FC}$ ,  $L_{CP}$ ,  $L_{PO}$ } [Condition\*Location:  $F_{6, 102} = 0.99$ ,  $p =$   
2 0.44; Condition:  $F_{2, 34} = 32.92$ ,  $p < 0.00001$ ; Location:  $F_{3, 51} = 4.95$ ,  $p = 0.00432$ ].

3 Thus, the large accuracy reductions with band/location-defined feature subsets confirmed  
4 that the full feature-set was crucial to high cross-task identification accuracy. Taken together, the  
5 cross-task/cross-day robustness of person identification with the full feature-set was consistent with  
6 the hypothesized properties of a configuration constrained by individual neurophysiology.

7

8

#### 9 **4. DISCUSSION**

10 The central motivation for the current study was whether RS-activity could support a critical  
11 demand for individualized longitudinal tracking, namely, decoding the origin of inter-day RS  
12 differences (i.e., *NP+* or *NP-*) from the relationship between the resting state activity patterns. A  
13 major obstacle to *NP+*/*NP-* decoding was the ill-defined rest task itself and its potential to confound  
14 the interpretation of RS-activity *differences*. To evaluate a *commonality*-based alternative, we  
15 hypothesized that the existence of an activity configuration defined by neurophysiological  
16 constraints would afford an escape from the confounding effects of the rest task. Our findings  
17 support the existence of such a configuration in the longitudinal characteristics of the EEG  
18 oscillatory power spectrum at rest. Formulated in terms of individual identification, inter-day  
19 differences in individual RS-activity were classified with high accuracy across a diverse range of  
20 confounding inter-day differences, with day-generalizability confirmed using aggregation. Consistent  
21 with a configuration based in whole-brain neurophysiology, accurate identification was higher with  
22 a full feature-set that enabled the integration of information from multiple frequency bands at  
23 channels distributed across the scalp.

24

25

26

#### 1 **4.1. Empirical simulations of cognitive and neurophysiological variation**

2 A methodological novelty here was our use of empirical “simulations”. Although ad hoc,  
3 they provided a means to obtain verifiable instances of cognitive state variation and  
4 neurophysiological change relative to RS.

5 As previous studies have demonstrated (Duncan and Northoff 2013; Kawagoe et al. 2018),  
6 the potential for arbitrary cognitive state variation during the rest task is related to experimental  
7 context and instructions. However, beyond the assumption that participants were awake, we did not  
8 model the participant’s cognitive state, for example, using participant’s self-reported subjective  
9 assessments of their cognitive state during the RS measurement (Diaz et al. 2013). Since the  
10 cognitive state and the extent of its fluctuation during rest are difficult to establish for each  
11 individual, the high identification accuracy with *RSI* might have been attributable to highly  
12 motivated and instruction-compliant participants rather than the neural characteristics of the rest  
13 state. Therefore, the *Tap* and *Sequence* tasks provided verifiable within-subject examples of states  
14 that deviated from rest in order to assess the generality of RS-based inferences.

15 In a longitudinal setting, the classification problem of interest requires a decision between  
16 *NP+* and *NP-* within the same individual. However, here *NP+* was defined based on samples of RS  
17 activity from *other* individuals. This use of inter-individual differences provided a pragmatic means  
18 to simulate a diverse range of possible changes to an individual’s neurophysiology (Figure 1B) with  
19 the assumption that detecting true within-subject neurophysiological change would possibly be far  
20 more challenging. For example, in the *Sequence* task, the motor learning across the five days in our  
21 experiment involved neuroplastic changes (Wymbs et al. 2012; Wymbs and Grafton 2014; Bassett  
22 et al. 2015) and the accompanying changes in *SeqWait* and *SeqMov* over the duration of the  
23 experiment (Figure 8) could be considered as consequence of this learning-induced neuroplasticity.  
24 However, due to the unclear carryover effects of these plastic changes on *RSI* over this five day  
25 period, we instead used the *SeqWait* and *SeqMov* to simulate incidental cognitive-state variations

1 (NP-) with high inter-day variance, where the neural dynamics on each day was a poor model of the  
2 dynamics on other days.

#### 3 4 **4.2. Reliability of identity inferences versus reliability of features**

5 Numerous prior studies have investigated the inter-day similarity in RS activity within a  
6 test-retest framework (Bijsterbosch et al. 2017; Cox et al. 2018; Noble et al. 2019; Postema et al.  
7 2019). In that framework, the focus is on evaluating whether a particular measure of RS activity on  
8 day  $p$  was reliably reproduced for RS activity on day  $q$  in the assumed absence of a true change.  
9 However, our focus is on the reliability of inferences in the assumed presence of true inter-day  
10 activity changes. This focus required differing considerations about how an individual's unique  
11 identity was defined and represented as illustrated with an analogy to object recognition.

12 Consider images of the same object  $X$  from day 1 (test) and day 2 (retest) (Figure 11)  
13 represented by a list of filled pixel locations (i.e., features). With this representation, a simple  
14 measure of test-retest reliability is whether a pixel's filled state on day 1 is a reliable predictor of its  
15 state on day 2. The scenario in Figure 11A is consistent with a *high* feature-level reliability as the  
16 majority of filled pixels on day 1 are also filled on day 2. However, this high reliability is  
17 misleading about the object's unique identity. On day 1, object  $X$  can be readily distinguished from  
18 object  $Y$  based on a few critical pixels (circled). These critical pixels on object  $X$  are, however,  
19 unfilled on day 2. Thus, object  $X$  is not uniquely identifiable on day 2 as it is now confusable with  
20 object  $Y$ . Conversely, in the scenario shown in Figure 11B, a pixel-based test of reliability would  
21 indicate a *low* reliability due to the large number of filled pixels from day 1 that are unfilled on day  
22 2. However, this low reliability is a limitation of how the object was represented (i.e., as a list of  
23 filled pixel locations relative to the main axes). If this representation included information about the  
24 relationships between the filled locations, then the object's defining characteristics would be  
25 deemed as being reliably conserved on day 2, e.g., a rotation of the object  $X$  on day 2 would bring it  
26 into correspondence with its form on day 1.



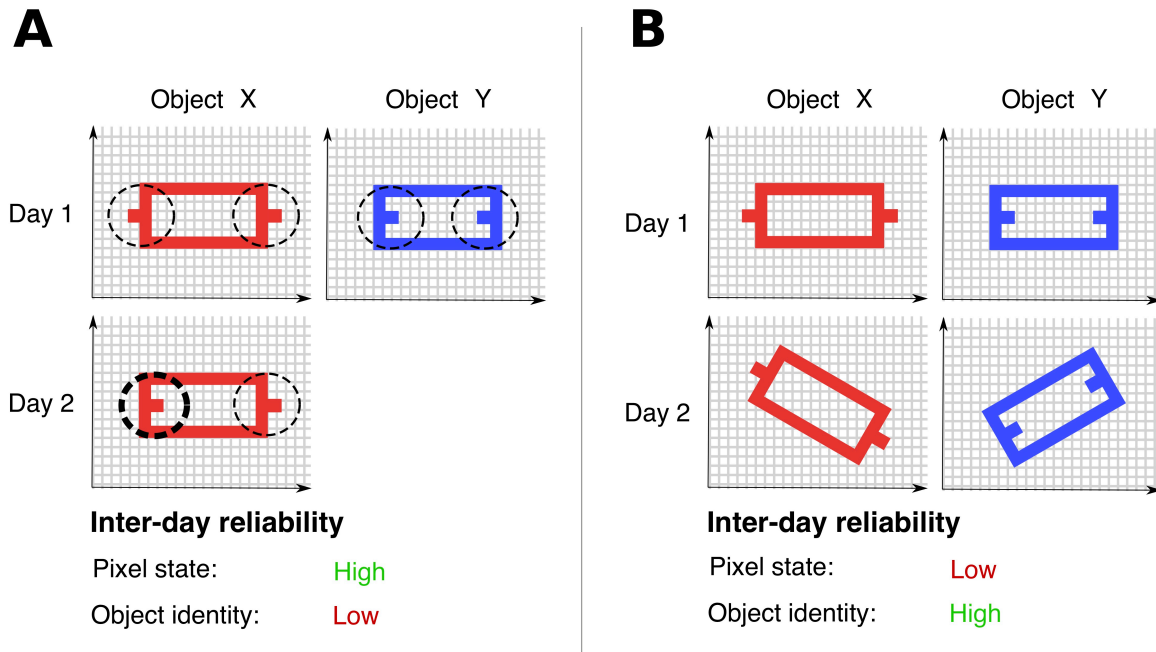

1 **Figure 11: Test-retest reliability versus individual re-identification.** (A) Objects *X* (red) and *Y* (blue) are uniquely  
2 defined by the configuration of filled and unfilled pixels. On day 1, (top row), the dotted circles indicates the critical  
3 pixels that distinguish *X* and *Y*. Most pixels of object *X* from day 1 are also filled on day 2 (lower row). However, pixels  
4 in the left dotted circle on day 2 differ in their state from day 1. Due to this difference on day 2, object *X* cannot be  
5 uniquely re-identified as being object *X* based on its form as it is now confusable with object *Y*. High inter-day  
6 reliability in pixel state does not imply the same for object identity. (B) The orientation of objects *X* on day 2 is rotated  
7 relative to its orientations on day 1. If this orientation is accounted for, then object *X* can be uniquely re-identified on  
8 day 2. However, when considering individual pixels, most of the filled pixels on day 1 are not on day 2. Low inter-day  
9 reliability in pixel state does not imply the same for object identity.  
10

1           As demonstrated by this analogy, high test-retest reliability of individual features does not  
2 imply the reliability of the configuration of these features to enable individual identification and  
3 vice versa. This relationship between reliability and how an individual's identity is defined and  
4 represented was a central consideration here.

5           Despite using an analogy of an individual's configuration to a static object in the above  
6 example, the core variance model in our analysis involved an assumption about time and time-  
7 scales. Each same-day measurement was segmented into 2s non-overlapping epochs where each  
8 epoch was treated as a sample drawn from an underlying individual-specific distribution. The  
9 dynamic variability between samples was assumed to be an important characteristic of this  
10 individual-specific distribution. Cross-day/cross-task identification was predicated on whether  
11 training classifiers based on the inter-sample variability on short time-scales (i.e., between the  
12 samples acquired within seconds/minutes of each other on the same day) was a viable model for  
13 samples obtained on long time-scales, i.e., days apart (Figure 1).

14           Even though we do not use an explicit model of functional connectivity, the multivariate  
15 representations used to represent an individual's decision-rule assumes a coupling between power  
16 values across distributed locations. A distinction is often drawn between static and dynamic  
17 connectivity based on how the neural time-series over the resting task is interpreted (Hutchison et  
18 al. 2013; Calhoun et al. 2014). Static connectivity refers to the extraction of a single measure (e.g., a  
19 graph) from the time-series. In contrast, dynamic connectivity is based on the view that resting state  
20 refers to a collection of states that dynamically vary at different time points. However, our approach  
21 and findings here are agnostic as to whether the inter-sample differences indicate variability around  
22 a characteristic mean value (i.e., static connectivity) or characteristic transitions between distinct  
23 states (i.e., dynamic connectivity). The relationship between the classifier-based multivariate  
24 representations to connectivity and distances measures (e.g., Valizadeh et al. 2019; Pani et al. 2020)  
25 is a key issue to be resolved by future studies.

26

### 1 **4.3. Individual identification and longitudinal tracking**

2 By using individual differences as a source of neurophysiological information, here the  
3 problem of distinguishing between *NP+* and *NP-* was equivalent to the problem of individual  
4 identification with similarities to numerous studies that have, for example, sought to use RS-EEG as  
5 an individual-specific signature for biometric identification (Campisi and Rocca 2014; Gui et al.  
6 2015; Valizadeh et al. 2019). However, our focus was not biometric identification or the important  
7 issues related to the neural basis of individual differences and trait-identification (Smit et al. 2005,  
8 2006; Demuru et al. 2017; Finn et al. 2017; Gratton et al. 2018). Nevertheless, our findings are  
9 consistent with these prior studies in demonstrating the high distinctiveness of individual  
10 differences and its robust detectability even across days and tasks from two-second snapshots of the  
11 oscillatory power spectra at rest.

12 However, the inter-individual differences in cross-day identification with *RSI* both with and  
13 without aggregation (Figure 5, 6A, 6C) also demonstrated that resting activity was not the strict  
14 equivalent of a “fingerprint”, i.e., in being entirely immune to cognitive state or even whether a  
15 person is alive (Campisi and Rocca 2014). Even though individual identification was possible  
16 across tasks with high accuracy, the RS-based individual signatures were not completely  
17 independent of cognitive state. Large deviations from rest during *TapMov* and *SeqMov* reduced  
18 cross-task identification accuracy even though identification was above random chance. These  
19 accuracy reductions were due to cognitive state differences with *RSI* and not merely because  
20 *TapMov* and *SeqMov* conditions lacked identifiable signatures or had more movement-related  
21 artifacts (Figure 8D).

22 The use of an individual identification strategy involved certain tradeoffs. An individual’s  
23 identity was defined by analyzing differences to other individuals in the studied group. Therefore,  
24 the characteristics represented by an individual  $S_X$ ’s decision-rule could vary depending on the  
25 properties of the other individuals in the group. Rather than the number of individuals in the group,  
26 the key determinants of how  $S_X$  is represented would be the diversity and properties of the most-

1 similar individuals (as illustrated by the confusion matrix and inter-individual clustering in Figure  
2 5). Furthermore, identifying features that distinguish an individual from others would lead to the  
3 exclusion of features *shared* by all individuals. For example, in a study of the heritability of  
4 individual RS-connectivity properties with magnetoencephalography (MEG) (Demuru et al. 2017),  
5 the explicit removal of connectivity characteristics shared by all individuals in the group was found  
6 to significantly improve individual identification. However, down-weighting the role of shared  
7 features (explicitly or implicitly) has a tradeoff for tracking neural plasticity since changes to an  
8 individual's neurophysiology on these shared features might go undetected.

9

#### 10 **4.4. What makes an individual configuration robust to changes in cognitive state?**

11 Our primary findings are based on black-box statistical inferences, namely, the pattern of  
12 classification accuracies obtained with different training/test sets that were selected based on  
13 experimental variables (e.g., the effect of day, the conditions defining the cognitive state, and the  
14 feature set). Therefore, an important issue is whether these statistical regularities are consistent with  
15 a neurophysiological signature in RS-activity rather than a byproduct of other factors specific to our  
16 implementation.

17 The shape of the power spectrum in the frequency domain at rest has long been suggested as  
18 an important individual characteristic (Näpflin et al. 2007; Chiang et al. 2011; Bazanova and  
19 Vernon 2014). This shape has multiple peaks over an aperiodic background of  $1/f$  noise. The  
20 specific frequencies at which these peaks occur, particularly in the  $\alpha$  band and in the  $\beta$  band have  
21 been the topic of considerable investigation (van Albada and Robinson 2013; Voytek et al. 2015).  
22 Importantly, in different cognitive states, the changes to this spectrum are not arbitrary and  
23 primarily involve changes to the power at the peaks (as well as small shifts in the peak frequency)  
24 but without large changes to the  $1/f$  background (Buzsáki et al. 2012; Haegens et al. 2014; Cole and  
25 Voytek 2017). Furthermore, Demuru and Fraschini (2020) found that this aperiodic background was

1 highly individual-specific and allowed individuals to be identified with higher accuracy than the  
2 power in canonical frequency bands.

3         Therefore one possibility to explain our results is that an individual's decision-rule  
4 implicitly represents the shape of their unique power spectrum. If this were the case then it would  
5 provide a plausible explanation for the observed high specificity despite cognitive state variation. In  
6 our feature representation, the power over the full power spectrum was averaged into five canonical  
7 bands. Therefore, capturing the individual shape of the spectrum and, for example, the approximate  
8 location of the  $\alpha$  power peak would require a role for features representing the power in the  $\theta$ ,  $\alpha$  and  
9  $\beta_1$  bands. Indeed, it was these three bands that also showed the main consistencies in term of a few,  
10 high valued weights. The classical depiction of the power spectrum is from a particular channel.  
11 Our finding suggests that representation of the individual-specific power in the different bands were  
12 distributed over the scalp with a concentration in the fronto-central and occipital zones. Although  
13 the power spectra are similar across channels, any one channel is an incomplete representation of  
14 that individual's characteristic power distribution. Consequently, it might lack the robustness to  
15 represent individual variability across days. By contrast, a decision-rule that combines each band's  
16 best representation might have a greater robustness.

17

#### 18 **4.4. Outlook**

19         In the current study, we assumed that individuals in the studied group did not undergo  
20 extensive plastic changes. If individual identification was not possible with longitudinal RS even  
21 with such a group of healthy individuals over a period of five days, then the merits of using RS as a  
22 tracking indicator would seem to require critical re-evaluation especially for tracking over longer  
23 periods of time and with populations where such neuroplastic changes would be expected. Prior  
24 studies have found changes to the power spectrum with aging (van Albada et al. 2010; Chiang et al.  
25 2011; Voytek et al. 2015; Knyazeva et al. 2018), for example, age-related reductions in the  
26 frequencies of the alpha and beta band peaks. Voytek et al. (2015) suggest that such changes might

1 indicate a change in the  $1/f$  baseline possibly due to increased physiological noise with  
2 aging. Furthermore, systematic longitudinal changes in the power spectrum have been observed  
3 following stroke (Giaquinto et al. 1994; Saes et al. 2020). Thus, the application of this physiological  
4 signature to monitor longitudinal RS in clinical populations is an important future priority.

5

## 1 **Acknowledgments**

2 This work was funded by the University of Cologne Emerging Groups Initiative (CONNECT  
3 group) implemented into the Institutional Strategy of the University of Cologne and the German  
4 Excellence Initiative; and by the Deutsche Forschungsgemeinschaft (DFG, German Research  
5 Foundation) – Project-ID 431549029 – SFB 1451. SD gratefully acknowledges support from the  
6 German Research Foundation (DA 1953/5-2). We thank Hannah Kirsten, Alexandra Kurganova,  
7 and members of the INM-3 for their valuable assistance in data acquisition.

8

## 9 **CRedit author statement**

10 **Maximilian Hommelsen:** Conceptualization, Methodology, Software, Validation, Formal analysis,  
11 Investigation, Writing: Original Draft, Visualization. **Shivakumar Viswanathan:**  
12 Conceptualization, Methodology, Software, Validation, Formal analysis, Writing: Review &  
13 Editing, Visualization. **Silvia Daun:** Conceptualization, Writing: Review & Editing, Visualization,  
14 Supervision, Project administration, Funding acquisition.

15

## 16 **Conflict of interest**

17 None

18

19

1 **APPENDIX**

2

**Table A.1:** Identification accuracies in different experimental states reported as Mean % (SD). All values were significantly above random chance (50%) (see Suppl. Table 1).

| States                   | Type             |                 |                 |                 |
|--------------------------|------------------|-----------------|-----------------|-----------------|
|                          | CV               | 1-day           | 2-day           | 3-day           |
| <i>RS1</i><br>(N=24)     | 99.98<br>(0.04)  | 92.10<br>(6.84) | 95.93<br>(3.63) | 97.39<br>(2.65) |
| <i>RS1</i><br>(N=18)     | 99.98<br>(0.06)  | 92.79<br>(6.76) | 96.61<br>(3.30) | 97.53<br>(2.51) |
| <i>RS2</i><br>(N=24)     | 99.99<br>(0.04)  | 91.58<br>(7.49) | 95.86<br>(4.18) | 96.99<br>(3.50) |
| <i>TapWait</i><br>(N=18) | 99.99<br>(0.02)  | 92.58<br>(6.39) | 96.36<br>(3.42) | 97.60<br>(2.77) |
| <i>SeqWait</i><br>(N=18) | 99.99<br>(0.02)  | 93.67<br>(7.35) | 97.12<br>(4.36) | 98.03<br>(3.80) |
| <i>TapMov</i><br>(N=18)  | 99.94<br>(0.12)  | 92.39<br>(6.72) | 96.12<br>(3.34) | 97.29<br>(2.41) |
| <i>SeqMov</i><br>(N=18)  | 100.00<br>(0.00) | 93.47<br>(8.41) | 96.67<br>(4.64) | 97.95<br>(2.99) |

3

4

5



1

**Table A.2:** Identification accuracies for *RSI* with mono-band and mono-location feature subsets reported as Mean % (SD). All values were significantly above random chance (50%) (see Suppl. Table 2).

| Subset<br>( <i>N</i> =24) | Type            |                  |                 |                 |
|---------------------------|-----------------|------------------|-----------------|-----------------|
|                           | CV              | 1-day            | 2-day           | 3-day           |
| $B_{\delta}$              | 96.10<br>(2.54) | 64.66<br>(7.92)  | 67.87<br>(8.12) | 70.12<br>(8.01) |
| $B_{\theta}$              | 97.63<br>(1.52) | 76.99<br>(7.69)  | 81.76<br>(7.11) | 83.70<br>(6.94) |
| $B_{\alpha}$              | 98.51<br>(1.17) | 84.20<br>(7.74)  | 88.38<br>(6.34) | 89.59<br>(5.67) |
| $B_{\beta 1}$             | 99.65<br>(0.57) | 81.41<br>(10.44) | 87.03<br>(9.03) | 88.92<br>(8.14) |
| $B_{\beta 2}$             | 99.74<br>(0.30) | 76.37<br>(9.98)  | 83.22<br>(9.00) | 86.66<br>(7.96) |
| $L_F$                     | 98.01<br>(1.80) | 82.68<br>(8.89)  | 87.30<br>(7.45) | 88.87<br>(6.56) |
| $L_{FC}$                  | 98.54<br>(1.55) | 86.93<br>(9.38)  | 90.39<br>(7.45) | 91.76<br>(6.12) |
| $L_{CP}$                  | 97.94<br>(1.78) | 85.28<br>(8.57)  | 89.43<br>(7.30) | 90.37<br>(6.52) |
| $L_{PO}$                  | 97.96<br>(2.02) | 81.02<br>(8.32)  | 86.47<br>(7.35) | 87.97<br>(7.06) |

2

3

1

**Table A.3:** Classification accuracy of *RSI* vs task state (binary, within-subject) reported as Mean % (SD). All values were significantly above random chance (50%) (see Suppl. Table 3).

| <i>RSI</i> vs<br>( <i>N</i> =18) | Type            |                 |                  |                  |
|----------------------------------|-----------------|-----------------|------------------|------------------|
|                                  | CV              | 1-day           | 2-day            | 3-day            |
| <i>TapWait</i>                   | 88.35<br>(5.66) | 62.91<br>(6.44) | 66.26<br>(8.69)  | 67.28<br>(9.11)  |
| <i>SeqWait</i>                   | 95.12<br>(3.74) | 67.79<br>(8.53) | 73.05<br>(11.01) | 74.86<br>(11.37) |
| <i>TapMov</i>                    | 93.56<br>(4.12) | 79.04<br>(7.17) | 82.75<br>(5.99)  | 84.18<br>(5.92)  |
| <i>SeqMov</i>                    | 97.81<br>(1.76) | 88.77<br>(5.21) | 92.81<br>(3.43)  | 93.32<br>(3.77)  |

2

3

**Table A.4:** Accuracy of cross-task  $^{RSI}I_p \rightarrow ^X I_q$  identification reported as Mean % (SD). All values were significantly above random chance (50%) (see Suppl. Table 4).

| Test states<br>( <i>N</i> = 18) | Type             |                 |                 |
|---------------------------------|------------------|-----------------|-----------------|
|                                 | 1-day            | 2-day           | 3-day           |
| <i>TapWait</i>                  | 91.90<br>(6.46)  | 95.84<br>(3.30) | 96.90<br>(2.44) |
| <i>SeqWait</i>                  | 90.81<br>(7.09)  | 94.95<br>(4.39) | 96.09<br>(3.40) |
| <i>TapMov</i>                   | 88.79<br>(7.57)  | 93.02<br>(5.49) | 94.01<br>(4.51) |
| <i>SeqMov</i>                   | 83.85<br>(10.35) | 88.39<br>(9.28) | 90.03<br>(8.87) |

4

5

## 1 REFERENCES

- 2 Abraham A, Elrahman SMA. 2013. A Review of Class Imbalance Problem. *J Netw Innov Comput.*  
3 1:332–340.
- 4 Alegre M, De Gurtubay IG, Labarga A, Iriarte J, Malanda A, Artieda J. 2004. Alpha and beta  
5 oscillatory activity during a sequence of two movements. *Clin Neurophysiol.* 115:124–130.
- 6 Barry RJ, Clarke AR, Johnstone SJ, Magee CA, Rushby JA. 2007. EEG differences between eyes-  
7 closed and eyes-open resting conditions. *Clin Neurophysiol.* 118:2765–2773.
- 8 Bassett DS, Yang M, Wymbs NF, Grafton ST. 2015. Learning-induced autonomy of sensorimotor  
9 systems. *Nat Neurosci.* 18:744–751.
- 10 Bazanova OM, Vernon D. 2014. Interpreting EEG alpha activity. *Neurosci Biobehav Rev.* 44:94–  
11 110.
- 12 Benjamin C, Lieberman DA, Changl M, Ofen N, Whitfield-Gabrieli S, Gabrieli JDE, Gaab N.  
13 2010. The influence of rest period instructions on the default mode network. *Front Hum*  
14 *Neurosci.* 4:1–9.
- 15 Bijsterbosch J, Harrison S, Duff E, Alfaro-Almagro F, Woolrich M, Smith S. 2017. Investigations  
16 into within- and between-subject resting-state amplitude variations. *Neuroimage.* 159:57–69.
- 17 Biswal B, Zerrin Yetkin F, Haughton VM, Hyde JS. 1995. Functional connectivity in the motor  
18 cortex of resting human brain using echo-planar mri. *Magn Reson Med.* 34:537–541.
- 19 Blondel VD, Guillaume JL, Lambiotte R, Lefebvre E. 2008. Fast unfolding of communities in large  
20 networks. *J Stat Mech Theory Exp.* 2008.
- 21 Blum A, Kalai A, Langford J. 1999. Beating the hold-out: bounds for K-fold and progressive cross-  
22 validation. *Proc Annu ACM Conf Comput Learn Theory.* 203–208.
- 23 Boersma M, Smit DJA, De Bie HMA, Van Baal GCM, Boomsma DI, De Geus EJC, Delemarre-  
24 Van De Waal HA, Stam CJ. 2011. Network analysis of resting state EEG in the developing  
25 young brain: Structure comes with maturation. *Hum Brain Mapp.* 32:413–425.

- 1 Bonkhoff AK, Hope T, Bzdok D, Guggisberg AG, Hawe RL, Dukelow SP, Rehme AK, Fink GR.  
2 2020. Bringing proportional recovery into proportion : Bayesian modelling of post-stroke  
3 motor impairment. 1–18.
- 4 Buckner RL, DiNicola LM. 2019. The brain’s default network: updated anatomy, physiology and  
5 evolving insights. *Nat Rev Neurosci*. 20:593–608.
- 6 Buzsáki G, Anastassiou C a., Koch C. 2012. The origin of extracellular fields and currents — EEG,  
7 ECoG, LFP and spikes. *Nat Rev Neurosci*. 13:407–420.
- 8 Cabeza R, Albert M, Belleville S, Craik FIM, Duarte A, Grady CL, Lindenberger U, Nyberg L,  
9 Park DC, Reuter-Lorenz PA, Rugg MD, Steffener J, Rajah MN. 2018. Maintenance, reserve  
10 and compensation: the cognitive neuroscience of healthy ageing. *Nat Rev Neurosci*. 19:701–  
11 710.
- 12 Calhoun VD, Miller R, Pearlson G, Adali T. 2014. The Chronnectome: Time-Varying Connectivity  
13 Networks as the Next Frontier in fMRI Data Discovery. *Neuron*. 84:262–274.
- 14 Campenhout JM Van. 1978. On the Peaking of the Hughes Mean Recognition Accuracy - the  
15 Resolution of an Apparent Paradox. *IEEE Trans Syst Man Cybern*. SMC-8:390–395.
- 16 Campisi P, Rocca D La. 2014. Brain waves for automatic biometric-based user recognition. *IEEE*  
17 *Trans Inf Forensics Secur*. 9:782–800.
- 18 Carino-Escobar RI, Carrillo-Mora P, Valdés-Cristerna R, Rodriguez-Barragan MA, Hernandez-  
19 Arenas C, Quinzaños-Fresnedo J, Galicia-Alvarado MA, Cantillo-Negrete J. 2019.  
20 Longitudinal analysis of stroke patients’ brain rhythms during an intervention with a brain-  
21 computer interface. *Neural Plast*. 2019.
- 22 Cassani R, Estarellas M, San-Martin R, Fraga FJ, Falk TH. 2018. Systematic review on resting-state  
23 EEG for Alzheimer’s disease diagnosis and progression assessment. *Dis Markers*. 2018.
- 24 Cassim F, Szurhaj W, Sediri H, Devos D, Bourriez JL, Poirot I, Derambure P, Defebvre L, Guieu  
25 JD. 2000. Brief and sustained movements: Differences in event-related (de)synchronization  
26 (ERD/ERS) patterns. *Clin Neurophysiol*. 111:2032–2039.

- 1 Chiang AKI, Rennie CJ, Robinson PA, van Albada SJ, Kerr CC. 2011. Age trends and sex  
2 differences of alpha rhythms including split alpha peaks. *Clin Neurophysiol.* 122:1505–1517.
- 3 Cole SR, Voytek B. 2017. Brain Oscillations and the Importance of Waveform Shape. *Trends Cogn  
4 Sci.* 21:137–149.
- 5 Cox R, Schapiro AC, Stickgold R. 2018. Variability and stability of large-scale cortical oscillation  
6 patterns. *Netw Neurosci.* 2:481–512.
- 7 Damoiseaux JS, Greicius AEMD. 2009. Greater than the sum of its parts : a review of studies  
8 combining structural connectivity and resting-state functional connectivity. 525–533.
- 9 Davis J, Goadrich M. 2006. The relationship between Precision-Recall and ROC curves. In: *ACM  
10 International Conference Proceeding Series.* p. 233–240.
- 11 Delorme A, Makeig S. 2004. EEGLAB: An open source toolbox for analysis of single-trial EEG  
12 dynamics including independent component analysis. *J Neurosci Methods.* 134:9–21.
- 13 Demuru M, Fraschini M. 2020. EEG fingerprinting: Subject-specific signature based on the  
14 aperiodic component of power spectrum. *Comput Biol Med.* 120:103748.
- 15 Demuru M, Gouw AA, Hillebrand A, Stam CJ, Van Dijk BW, Scheltens P, Tijms BM,  
16 Konijnenberg E, Ten Kate M, Den Braber A, Smit DJA, Boomsma DI, Visser PJ. 2017.  
17 Functional and effective whole brain connectivity using magnetoencephalography to identify  
18 monozygotic twin pairs. *Sci Rep.* 7:1–11.
- 19 Diaz BA, van der Sluis S, Moens S, Benjamins JS, Migliorati F, Stoffers D, den Braber A, Poil SS,  
20 Hardstone R, Van't Ent D V., Boomsma DI, de Geus E, Mansvelder HD, Van Someren EJW,  
21 Linkenkaer-Hansen K. 2013. The Amsterdam Resting-state Questionnaire reveals multiple  
22 phenotypes of resting-state cognition. *Front Hum Neurosci.* 7:1–15.
- 23 Diedrichsen J, Kriegeskorte N. 2017. Representational models: A common framework for  
24 understanding encoding, pattern-component, and representational-similarity analysis, *PLoS  
25 Computational Biology.*
- 26 Dimsdale-Zucker HR, Ranganath C. 2019. *Representational Similarity Analyses: A Practical Guide*

- 1 for Functional MRI Applications. *Handb Behav Neurosci.* 28:509–525.
- 2 Duncan NW, Northoff G. 2013. Overview of potential procedural and participant-related confounds  
3 for neuroimaging of the resting state. *J Psychiatry Neurosci.* 38:84–96.
- 4 Erbil N, Ungan P. 2007. Changes in the alpha and beta amplitudes of the central EEG during the  
5 onset, continuation, and offset of long-duration repetitive hand movements. *Brain Res.*  
6 1169:44–56.
- 7 Finn ES, Scheinost D, Finn DM, Shen X, Papademetris X, Constable RT. 2017. Can brain state be  
8 manipulated to emphasize individual differences in functional connectivity? *Neuroimage.*  
9 160:140–151.
- 10 Finn ES, Shen X, Scheinost D, Rosenberg MD, Huang J, Chun MM, Papademetris X, Constable  
11 RT. 2015. Functional connectome fingerprinting: Identifying individuals using patterns of  
12 brain connectivity. *Nat Neurosci.* 18:1664–1671.
- 13 Giaquinto S, Cobiauchi A, Macera F, Nolfi G. 1994. EEG Recordings in the course of recovery  
14 from stroke. *Stroke.* 25:2204–2209.
- 15 Gonzalez-Castillo J, Kam JWY, Colin HW, Bandettini PA. 2021. How to interpret resting-state  
16 fMRI : ask your participants . 41:1–19.
- 17 Gratton C, Laumann TO, Nielsen AN, Greene DJ, Gordon EM, Gilmore AW, Nelson SM, Coalson  
18 RS, Snyder AZ, Schlaggar BL, Dosenbach NUF, Petersen SE. 2018. Functional Brain  
19 Networks Are Dominated by Stable Group and Individual Factors, Not Cognitive or Daily  
20 Variation. *Neuron.* 98:439-452.e5.
- 21 Grefkes C, Fink GR. 2020. Recovery from stroke : current concepts and future perspectives. 6.
- 22 Gui Q, Jin Z, Xu W. 2015. Exploring EEG-based biometrics for user identification and  
23 authentication. 2014 IEEE Signal Process Med Biol Symp IEEE SPMB 2014 - Proc. 1–6.
- 24 Haegens S, Cousijn H, Wallis G, Harrison PJ, Nobre AC. 2014. Inter- and intra-individual  
25 variability in alpha peak frequency. *Neuroimage.* 92:46–55.
- 26 Haufe S, Meinecke F, Görgen K, Dähne S, Haynes JD, Blankertz B, Bießmann F. 2014. On the

- 1 interpretation of weight vectors of linear models in multivariate neuroimaging. *Neuroimage*.  
2 87:96–110.
- 3 Hermundstad AM, Bassett DS, Brown KS, Aminoff EM, Clewett D, Freeman S, Frithsen A,  
4 Johnson A, Tipper CM, Miller MB, Grafton ST, Carlson JM. 2013. Structural foundations of  
5 resting-state and task-based functional connectivity in the human brain. *Proc Natl Acad Sci U*  
6 *S A*.
- 7 Hoenig MC, Bischof GN, Seemiller J, Hammes J, Kukulja J, Onur ÖA, Jessen F, Fliessbach K,  
8 Neumaier B, Fink GR, van Eimeren T, Drzezga A. 2018. Networks of tau distribution in  
9 Alzheimer’s disease. *Brain*.
- 10 Huang X, Altahat S, Tran D, Sharma D. 2012. Human identification with electroencephalogram  
11 (EEG) signal processing. *2012 Int Symp Commun Inf Technol Isc 2012*. 1021–1026.
- 12 Hutchison RM, Womelsdorf T, Allen EA, Bandettini PA, Calhoun VD, Corbetta M, Della Penna S,  
13 Duyn JH, Glover GH, Gonzalez-Castillo J, Handwerker DA, Keilholz S, Kiviniemi V,  
14 Leopold DA, de Pasquale F, Sporns O, Walter M, Chang C. 2013. Dynamic functional  
15 connectivity: Promise, issues, and interpretations. *Neuroimage*. 80:360–378.
- 16 Kawagoe T, Onoda K, Yamaguchi S. 2018. Different pre-scanning instructions induce distinct  
17 psychological and resting brain states during functional magnetic resonance imaging. *Eur J*  
18 *Neurosci*. 47:77–82.
- 19 Kehagias A. 2021. Community Detection Toolbox  
20 ([https://www.mathworks.com/matlabcentral/fileexchange/45867-community-detection-](https://www.mathworks.com/matlabcentral/fileexchange/45867-community-detection-toolbox)  
21 [toolbox](https://www.mathworks.com/matlabcentral/fileexchange/45867-community-detection-toolbox)), MATLAB Central File Exchange.
- 22 Knyazeva MG, Barzegaran E, Vildavski VY, Demonet J-F. 2018. Aging of human alpha rhythm.  
23 *Neurobiol Aging*. 69:261–273.
- 24 Mišić B, Betzel RF, De Reus MA, Van Den Heuvel MP, Berman MG, McIntosh AR, Sporns O.  
25 2016. Network-level structure-function relationships in human neocortex. *Cereb Cortex*.  
26 26:3285–3296.

- 1 Mognon A, Jovicich J, Bruzzone L, Buiatti M. 2011. ADJUST: An automatic EEG artifact detector  
2 based on the joint use of spatial and temporal features. *Psychophysiology*. 48:229–240.
- 3 Näpflin M, Wildi M, Sarnthein J. 2007. Test-retest reliability of resting EEG spectra validates a  
4 statistical signature of persons. *Clin Neurophysiol*. 118:2519–2524.
- 5 Newbold DJ, Laumann TO, Hoyt CR, Hampton JM, Montez DF, Raut R V., Ortega M, Mitra A,  
6 Nielsen AN, Miller DB, Adeyemo B, Nguyen AL, Scheidter KM, Tanenbaum AB, Van AN,  
7 Marek S, Schlaggar BL, Carter AR, Greene DJ, Gordon EM, Raichle ME, Petersen SE, Snyder  
8 AZ, Dosenbach NUF. 2020. Plasticity and Spontaneous Activity Pulses in Disused Human  
9 Brain Circuits. *Neuron*. 0:1–10.
- 10 Noble S, Scheinost D, Constable RT. 2019. A decade of test-retest reliability of functional  
11 connectivity: A systematic review and meta-analysis. *Neuroimage*. 203:116157.
- 12 O’Brien F, Cousineau D. 2014. Representing Error bars in within-subject designs in typical  
13 software packages. *Quant Methods Psychol*. 10:56–67.
- 14 Oldfield RC. 1971. The assessment and analysis of handedness: The Edinburgh inventory.  
15 *Neuropsychologia*. 9:97–113.
- 16 Pani SM, Ciuffi M, Demuru M, La Cava SM, Bazzano G, D’Aloja E, Fraschini M. 2020. Subject,  
17 session and task effects on power, connectivity and network centrality: A source-based EEG  
18 study. *Biomed Signal Process Control*. 59.
- 19 Pedregosa F, Weiss R, Brucher M, Varoquaux G, Gramfort A, Michel V, Thirion B, Grisel O,  
20 Blondel M, Prettenhofer P, Weiss R, Dubourg V, Vanderplas J, Passos A, Cournapeau D,  
21 Brucher M, Perrot M, Duchesnay É. 2011. Scikit-learn: Machine Learning in Python. *J Mach  
22 Learn Res*. 12:2825–2830.
- 23 Pfurtscheller G, Lopes da Silva FH. 1999. Event-related EEG/MEG synchronization and  
24 desynchronization: basic principles. *Clin Neurophysiol*. 110:1842–1857.
- 25 Postema MC, De Marco M, Colato E, Venneri A. 2019. A study of within-subject reliability of the  
26 brain’s default-mode network. *Magn Reson Mater Physics, Biol Med*. 32:391–405.



- 1 Pritschet L, Santander T, Taylor CM, Layher E, Yu S, Miller MB, Grafton ST, Jacobs EG. 2020.  
2 Functional reorganization of brain networks across the human menstrual cycle. *Neuroimage*.  
3 220:117091.
- 4 Rehme AK, Fink GR, Cramon DY Von, Grefkes C. 2011. The Role of the Contralateral Motor  
5 Cortex for Motor Recovery in the Early Days after Stroke Assessed with Longitudinal fMRI.
- 6 Rifkin R, Klautau A. 2004. In Defense of One-Vs-All Classification. *J Mach Learn Res*. 5:2–6.
- 7 Saes M, Zandvliet SB, Andringa AS, Daffertshofer A, Twisk JWR, Meskers CGM, van Wegen  
8 EEH, Kwakkel G. 2020. Is Resting-State EEG Longitudinally Associated With Recovery of  
9 Clinical Neurological Impairments Early Poststroke? A Prospective Cohort Study.  
10 *Neurorehabil Neural Repair*. 34:389–402.
- 11 Schrouff J, Mourao-Miranda J. 2018. Interpreting weight maps in terms of cognitive or clinical  
12 neuroscience: Nonsense? 2018 Int Work Pattern Recognit Neuroimaging, PRNI 2018.
- 13 Sima C, Dougherty ER. 2008. The peaking phenomenon in the presence of feature-selection.  
14 *Pattern Recognit Lett*. 29:1667–1674.
- 15 Smit CM, Wright MJ, Hansell NK, Geffen GM, Martin NG. 2006. Genetic variation of individual  
16 alpha frequency (IAF) and alpha power in a large adolescent twin sample. *Int J Psychophysiol*.  
17 61:235–243.
- 18 Smit DJA, Posthuma D, Boomsma DI, De Geus EJC. 2005. Heritability of background EEG across  
19 the power spectrum. *Psychophysiology*. 42:691–697.
- 20 Valizadeh SA, Riener R, Elmer S, Jäncke L. 2019. Decrypting the electrophysiological  
21 individuality of the human brain: Identification of individuals based on resting-state EEG  
22 activity. *Neuroimage*. 197:470–481.
- 23 Vallat R. 2018. Pingouin: statistics in Python. *J Open Source Softw*. 3:1026.
- 24 van Albada SJ, Kerr CC, Chiang AKI, Rennie CJ, Robinson PA. 2010. Neurophysiological changes  
25 with age probed by inverse modeling of EEG spectra. *Clin Neurophysiol*. 121:21–38.
- 26 van Albada SJ, Robinson PA. 2013. Relationships between electroencephalographic spectral peaks

- 1 across frequency bands. *Front Hum Neurosci.* 7:1–18.
- 2 Van Den Heuvel MP, Mandl RCW, Kahn RS, Hulshoff Pol HE. 2009. Functionally linked resting-  
3 state networks reflect the underlying structural connectivity architecture of the human brain.  
4 *Hum Brain Mapp.* 30:3127–3141.
- 5 van der Vliet R, Selles RW, Andrinopoulou ER, Nijland R, Ribbers GM, Frens MA, Meskers C,  
6 Kwakkel G. 2020. Predicting Upper Limb Motor Impairment Recovery after Stroke: A  
7 Mixture Model. *Ann Neurol.* 87:383–393.
- 8 Varoquaux G, Raamana PR, Engemann DA, Hoyos-Idrobo A, Schwartz Y, Thirion B. 2017.  
9 Assessing and tuning brain decoders: Cross-validation, caveats, and guidelines. *Neuroimage.*  
10 145:166–179.
- 11 Vecchio F, Babiloni C, Lizio R, De Vico Fallani F, Blinowska K, Verrienti G, Frisoni G, Rossini  
12 PM. 2013. Resting state cortical EEG rhythms in Alzheimer’s disease: Toward EEG markers  
13 for clinical applications: A review. 1st ed, *Supplements to Clinical Neurophysiology.* Elsevier  
14 B.V.
- 15 Voytek B, Kramer MA, Case J, Lepage KQ, Tempesta ZR, Knight RT, Gazzaley A. 2015. Age-  
16 Related Changes in 1/f Neural Electrophysiological Noise. *J Neurosci.* 35:13257–13265.
- 17 Watson D, Clark LA, Tellegen A. 1988. Development and validation of brief measures of positive  
18 and negative affect: The PANAS scales. *J Pers Soc Psychol.* 54:1063–1070.
- 19 Winkler I, Debener S, Muller KR, Tangermann M. 2015. On the influence of high-pass filtering on  
20 ICA-based artifact reduction in EEG-ERP. *Proc Annu Int Conf IEEE Eng Med Biol Soc*  
21 *EMBS.* 2015-Novem:4101–4105.
- 22 Wu J, Srinivasan R, Quinlan EB, Solodkin A, Small SL, Cramer SC. 2016. Utility of EEG measures  
23 of brain function in patients with acute stroke. *J Neurophysiol.* 115:2399–2405.
- 24 Wymbs NF, Bassett DS, Mucha PJ, Porter M a., Grafton ST. 2012. Differential Recruitment of the  
25 Sensorimotor Putamen and Frontoparietal Cortex during Motor Chunking in Humans. *Neuron.*  
26 74:936–946.

1 Wymbs NF, Grafton ST. 2014. The Human Motor System Supports Sequence-Specific  
2 Representations over Multiple Training-Dependent Timescales. *Cereb Cortex*. 25:4213–4225.

3

4

5

6

## **SUPPLEMENTARY MATERIAL**

### **Robustness of individualized inferences from longitudinal resting state dynamics**

Maximilian HOMMELSEN, Shivakumar VISWANATHAN, Silvia DAUN

| <b>Supplementary Table 1: One-sample t-tests of mean identification accuracy in different states (see Table A.1) vs random chance (50%) reported as t-value (p-value).</b> |                        |                      |                      |                      |
|----------------------------------------------------------------------------------------------------------------------------------------------------------------------------|------------------------|----------------------|----------------------|----------------------|
| <b>States</b>                                                                                                                                                              | <b>Type</b>            |                      |                      |                      |
|                                                                                                                                                                            | <b>CV</b>              | <b>1-day</b>         | <b>2-day</b>         | <b>3-day</b>         |
| <b><i>RS1</i></b><br>( <i>df</i> =23)                                                                                                                                      | 5596.13<br>(< 0.00001) | 30.14<br>(< 0.00001) | 61.95<br>(< 0.00001) | 87.59<br>(< 0.00001) |
| <b><i>RS1</i></b><br>( <i>df</i> =17)                                                                                                                                      | 3464.12<br>(< 0.00001) | 26.85<br>(< 0.00001) | 60.01<br>(< 0.00001) | 80.39<br>(< 0.00001) |
| <b><i>RS2</i></b><br>( <i>df</i> =23)                                                                                                                                      | 6264.07<br>(< 0.00001) | 27.19<br>(< 0.00001) | 53.70<br>(< 0.00001) | 65.70<br>(< 0.00001) |
| <b><i>TapWait</i></b><br>( <i>df</i> =17)                                                                                                                                  | 9303.05<br>(< 0.00001) | 28.30<br>(< 0.00001) | 57.45<br>(< 0.00001) | 73.02<br>(< 0.00001) |
| <b><i>SeqWait</i></b><br>( <i>df</i> =17)                                                                                                                                  | 9303.05<br>(< 0.00001) | 25.21<br>(< 0.00001) | 45.89<br>(< 0.00001) | 53.57<br>(< 0.00001) |
| <b><i>TapMov</i></b><br>( <i>df</i> =17)                                                                                                                                   | 1739.06<br>(< 0.00001) | 26.75<br>(< 0.00001) | 58.60<br>(< 0.00001) | 83.32<br>(< 0.00001) |
| <b><i>SeqMov</i></b><br>( <i>df</i> =17)                                                                                                                                   | 2215.05<br>(< 0.00001) | 21.93<br>(< 0.00001) | 42.65<br>(< 0.00001) | 67.95<br>(< 0.00001) |

| <b>Supplementary table 2: One-sample t-tests of mean identification accuracy for <i>RSI</i> with mono-band and mono-location feature subsets (see Table A.2) vs random chance (50%) reported as t-value (p-value).</b> |                           |                          |                          |                          |
|------------------------------------------------------------------------------------------------------------------------------------------------------------------------------------------------------------------------|---------------------------|--------------------------|--------------------------|--------------------------|
| <b>Subset</b><br>( <i>df</i> =23)                                                                                                                                                                                      | <b>Type</b>               |                          |                          |                          |
|                                                                                                                                                                                                                        | <b>CV</b>                 | <b>1-day</b>             | <b>2-day</b>             | <b>3-day</b>             |
| $B_{\delta}$                                                                                                                                                                                                           | 88.62<br>( $< 0.00001$ )  | 9.07<br>( $< 0.00001$ )  | 10.79<br>( $< 0.00001$ ) | 12.29<br>( $< 0.00001$ ) |
| $B_{\theta}$                                                                                                                                                                                                           | 151.87<br>( $< 0.00001$ ) | 17.20<br>( $< 0.00001$ ) | 21.88<br>( $< 0.00001$ ) | 23.79<br>( $< 0.00001$ ) |
| $B_{\alpha}$                                                                                                                                                                                                           | 202.00<br>( $< 0.00001$ ) | 21.64<br>( $< 0.00001$ ) | 29.69<br>( $< 0.00001$ ) | 34.22<br>( $< 0.00001$ ) |
| $B_{\beta 1}$                                                                                                                                                                                                          | 415.09<br>( $< 0.00001$ ) | 14.73<br>( $< 0.00001$ ) | 20.09<br>( $< 0.00001$ ) | 23.42<br>( $< 0.00001$ ) |
| $B_{\beta 2}$                                                                                                                                                                                                          | 703.68<br>( $< 0.00001$ ) | 12.95<br>( $< 0.00001$ ) | 18.10<br>( $< 0.00001$ ) | 22.61<br>( $< 0.00001$ ) |
| $L_F$                                                                                                                                                                                                                  | 131.76<br>( $< 0.00001$ ) | 18.00<br>( $< 0.00001$ ) | 24.50<br>( $< 0.00001$ ) | 29.01<br>( $< 0.00001$ ) |
| $L_{FC}$                                                                                                                                                                                                               | 154.96<br>( $< 0.00001$ ) | 19.29<br>( $< 0.00001$ ) | 26.54<br>( $< 0.00001$ ) | 33.46<br>( $< 0.00001$ ) |
| $L_{CP}$                                                                                                                                                                                                               | 132.33<br>( $< 0.00001$ ) | 20.15<br>( $< 0.00001$ ) | 26.47<br>( $< 0.00001$ ) | 30.29<br>( $< 0.00001$ ) |
| $L_{PO}$                                                                                                                                                                                                               | 116.20<br>( $< 0.00001$ ) | 18.26<br>( $< 0.00001$ ) | 24.30<br>( $< 0.00001$ ) | 26.33<br>( $< 0.00001$ ) |

**Supplementary table 3:** One-sample t-tests of classification accuracy of *RSI* vs task state (see Table A.3) against random chance (50%) reported as t-value (p-value).

| <i>RSI</i> vs<br>( <i>df</i> =17) | Type                      |                          |                          |                          |
|-----------------------------------|---------------------------|--------------------------|--------------------------|--------------------------|
|                                   | CV                        | 1-day                    | 2-day                    | 3-day                    |
| <i>TapWait</i>                    | 28.74<br>( $< 0.00001$ )  | 8.51<br>( $< 0.00001$ )  | 7.94<br>( $< 0.00001$ )  | 8.05<br>( $< 0.00001$ )  |
| <i>SeqWait</i>                    | 50.81<br>( $< 0.00001$ )  | 8.85<br>( $< 0.00001$ )  | 8.88<br>( $< 0.00001$ )  | 9.28<br>( $< 0.00001$ )  |
| <i>TapMov</i>                     | 45.23<br>( $< 0.00001$ )  | 17.19<br>( $< 0.00001$ ) | 23.18<br>( $< 0.00001$ ) | 24.49<br>( $< 0.00001$ ) |
| <i>SeqMov</i>                     | 119.60<br>( $< 0.00001$ ) | 31.55<br>( $< 0.00001$ ) | 52.90<br>( $< 0.00001$ ) | 48.70<br>( $< 0.00001$ ) |

**Supplementary table 4:** One-sample t-tests of cross-task  $^{RSI}I_p \rightarrow^X I_q$  identification accuracy (see Table A.4) against random chance (50%) reported as t-value (p-value).

| Test states<br>( <i>df</i> = 17) | Type                     |                          |                          |
|----------------------------------|--------------------------|--------------------------|--------------------------|
|                                  | 1-day                    | 2-day                    | 3-day                    |
| <i>TapWait</i>                   | 27.52<br>( $< 0.00001$ ) | 58.90<br>( $< 0.00001$ ) | 81.63<br>( $< 0.00001$ ) |
| <i>SeqWait</i>                   | 24.43<br>( $< 0.00001$ ) | 43.39<br>( $< 0.00001$ ) | 57.55<br>( $< 0.00001$ ) |
| <i>TapMov</i>                    | 21.73<br>( $< 0.00001$ ) | 33.23<br>( $< 0.00001$ ) | 41.42<br>( $< 0.00001$ ) |
| <i>SeqMov</i>                    | 13.88<br>( $< 0.00001$ ) | 17.55<br>( $< 0.00001$ ) | 19.14<br>( $< 0.00001$ ) |

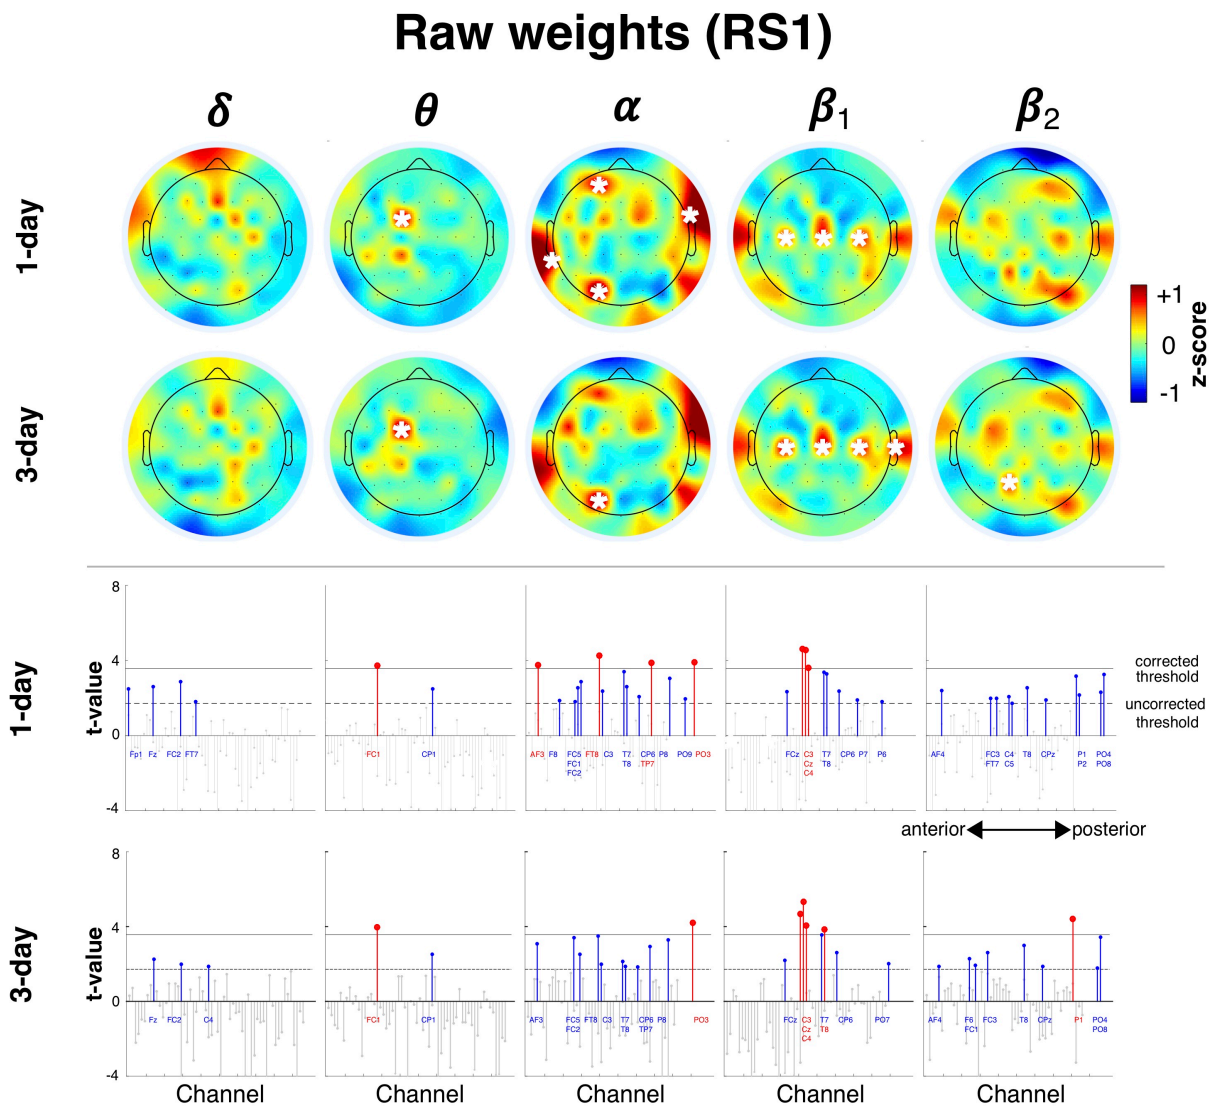

**Supplementary Figure 1: High-consistency features (raw weights).** Spatial distribution of high-consistency raw weights for frequency bands of full feature set (z-scored across all features) and their aggregation-related changes (1-day, 3-day). Mean weights in each scalp map that were significantly greater than zero are indicated with a white asterisk ( $p < 0.05/61$ ). Lower two rows show  $t$ -values for the features corresponding to the upper rows. Channels have an anterior-to-posterior ordering (x-axis). Red stems indicate channels with  $t$ -values higher than the corrected threshold ( $p < 0.05/61$ , horizontal black line) while blue stems show channels that only pass uncorrected thresholds ( $p < 0.05$ , dotted horizontal line). Colored channel labels are grouped from top-to-bottom for visibility and correspond to stems from left to right.



## Supplementary Figure 2: Concentration of high-relevance features in $B_\alpha$ and $L_{FC}$

The feature weights were used to assess whether differences in cross-day accuracies between the mono-band and mono-location subsets were an indicator of their relevance in the full feature set. For example, if subset  $S_x$  in isolation had a higher cross-day accuracy than  $S_y$ , then  $S_x$  might have a larger concentration of high-weighted features than  $S_y$  as part of the full feature-set. To test this simplistic prediction, we evaluated the relative concentration of features with large weights (specified by percentile) in the different mono-band (Suppl. Figure 2A) and mono-location subsets (Suppl. Figure 2B).

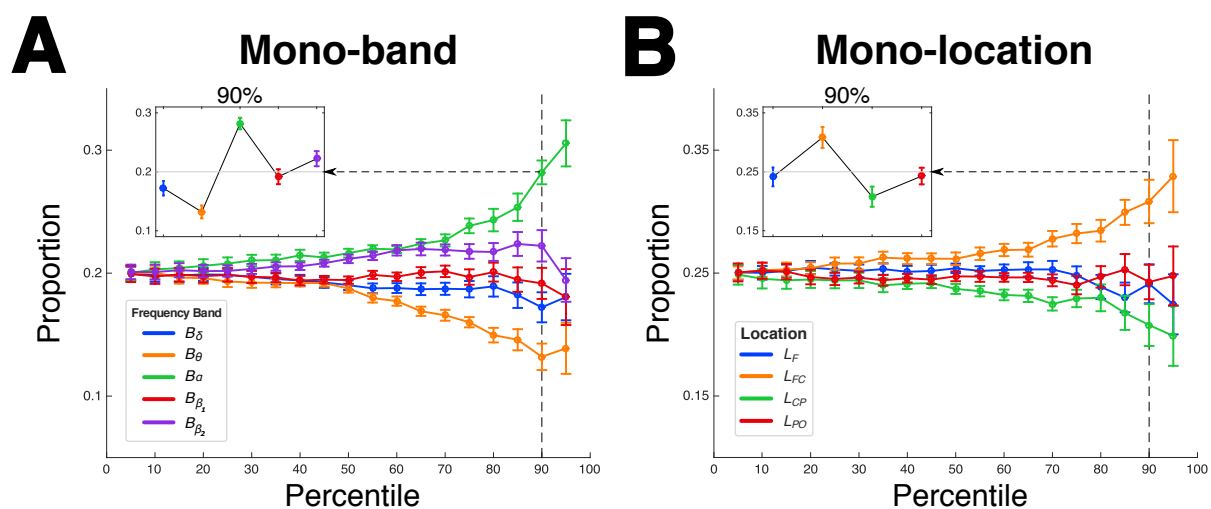

**Supplementary Figure 2: High-valued weights.** Mean proportions of high-valued (absolute) weights in the mono-band subsets (panel **A**) and mono-location subsets (panel **B**) at increasing percentiles (x-axis). Proportions (y-axis) are shown as deviations from an equal distribution across subsets ( $1/5 = 0.2$ , upper panel; and  $1/4 = 0.25$ ; lower panel). Insets show weight distribution in the 90<sup>th</sup> percentile (vertical dotted line). Error bars: Within-subject s.e.m

The distribution of high-valued weights in the mono-band/location subsets was estimated as follows. For each individual, the absolute weights of all features were first sorted. The weights in the  $k^{\text{th}}$  percentile of the sorted weights were then identified and the relative proportion of these selected high-valued weights contained in each of the mono-band sets was then calculated. This procedure was repeated for different values of  $k$ . These proportions were separately calculated for the mono-location sets. Since the temporal channels were not included in any of the mono-location subsets, these channels were excluded for the proportion calculations.

The relative proportion of high-weighted features in the different mono-band subsets diverged at higher percentiles [ANOVA, Band  $\{B_\delta, B_\theta, B_\alpha, B_{\beta_1}, B_{\beta_2}\}$  x Percentile  $\{5\%, 10\% \dots 95\%\}$ , Band\*Perc:  $F_{72, 1656} = 5.08$ ,  $p < 0.00001$ ; Band:  $F_{4, 92} = 7.26$ ,  $p = 0.00003$ ; Perc:

$F_{18,414} < 0.001$ ,  $p = 1$ ].  $B_\alpha$  contained the largest proportion of high-valued weights in the 90<sup>th</sup> percentile (inset, panel A). This ordering was qualitatively similar to the cross-day accuracies for the mono-band feature sets (Figure 6A), where  $B_\alpha$  had the highest mean cross-day accuracy. However, the proportion of high weights in  $B_\delta$  was comparable to the other subsets despite having a lower cross-day accuracy than the other subsets. The relative proportion of high-weighted features in the mono-location subsets also diverged at higher percentiles [ANOVA, Location:  $\{L_F, L_{FC}, L_{CP}, L_{PO}\}$  x Percentile  $\{5\%, 10\% \dots 95\%\}$ , Location\*Perc:  $F_{54,1242} = 2.00$ ,  $p = 0.00003$ ; Location:  $F_{3,69} = 3.71$ ,  $p = 0.015$ ; Type:  $F_{18,414} < 0.001$ ,  $p = 1$ ]. The fronto-central  $L_{FC}$  subset contained a higher proportion of high-valued weights in the 90<sup>th</sup> percentile than  $L_{CP}$  that was immediately posterior to  $L_{FC}$  (inset, panel B). By contrast, the mean cross-day accuracies for  $L_{FC}$  and  $L_{CP}$  in isolation were comparably similar (Figure 6C).

The concentration of high-valued weights in the different feature subsets was not a simple indicator of how these feature sets might contribute to high cross-day accuracy. However, it revealed consistencies in the distribution of relevant features across individuals, notably in  $B_\alpha$  and  $L_{FC}$ .

## Normalized Weights (t-values)

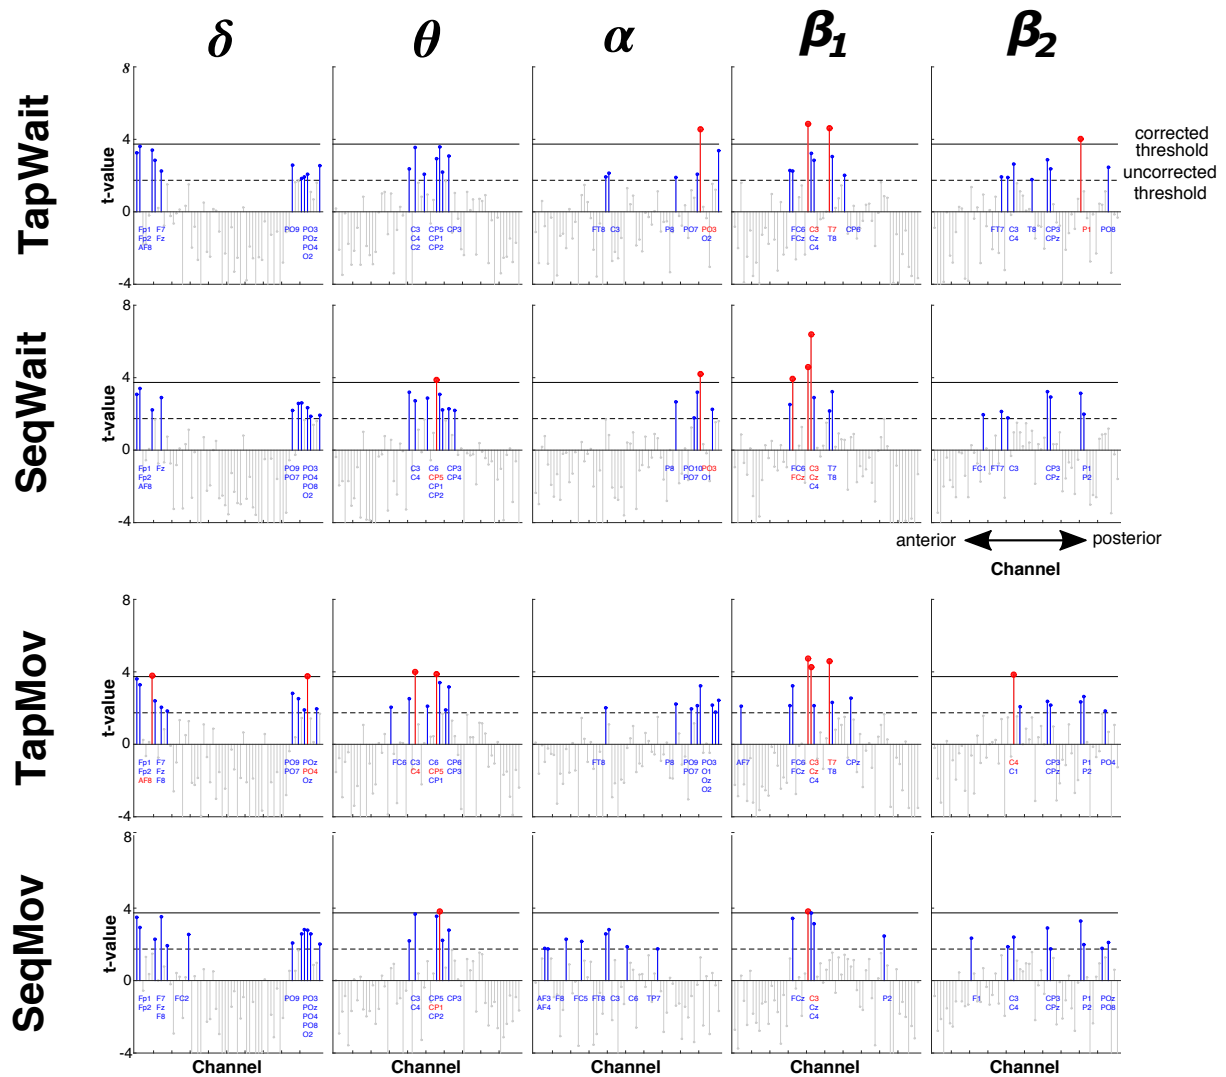

**Supplementary Figure 3:** Stem plot of t-values of high-consistency weights (1-day) in task-states per frequency band from Figure 9A. All labeling conventions are as in Suppl. Figure 1.
